# Supplementary material for: Pharmacological Modulation of Energy and Metabolic Pathways Protects Hearing in the Fus1 KO Model of Mitochondrial Dysfunction and Oxidative Stress
Source: Preprints.org preprint supplement (doi:10.20944/preprints202305.1260.v1), 2023-05-18
Supplement: Supplementary file 1 [file supplementary]

## Sheet: Table S1
Table S1: Upregulated and downregulated genes in the Fus1 KO mouse cochlea
Gene expression is expressed as a fold change relative to WT levels.
Note: cut off parameters for creating these gene sets were fold change x1.3 and expression level intensity -4 (Log2 value).
Genes upregulated in the Fus1 KO cochlea
Gene name	Intensity	Intensity	Fold change
	WT (log)	KO (log)	KO/WT (linear)
Ucp1	5.52	7.85	5.01
Lect1	9.28	10.93	3.14
Bpifb1	5.83	7.47	3.13
Gh	10.35	11.88	2.89
Cga	5.29	6.81	2.87
Retnla	4.84	6.28	2.71
Lipf	4.97	6.35	2.59
Prl	10.74	12.1	2.56
Gm21860	6.58	7.82	2.36
Gm21748	6.58	7.82	2.36
Cfd	5.72	6.95	2.34
Gm13304; Gm21541; Ccl21b	7.32	8.43	2.16
Gm10591	7.36	8.46	2.15
Pck1	5.04	6.13	2.12
Tmem132c	6.49	7.57	2.11
Gm13304	7.24	8.31	2.1
Aqp7	5.45	6.52	2.09
Slc25a31	4.17	5.22	2.07
Adtrp	6.02	7.05	2.05
Fam183b	5.98	7.01	2.05
Fam132a	5.79	6.8	2.02
Gm1673	5.26	6.27	2
Bpifa1	10.2	11.17	1.97
Gal3st2	7.66	8.63	1.96
Iqcf6	5.04	6.01	1.96
Dpt	6.93	7.88	1.94
1700001C02Rik	6.14	7.1	1.94
Tekt2	4.57	5.52	1.93
Chrnb1	6.58	7.52	1.92
Gabrp	5.3	6.24	1.92
4921536K21Rik	4.18	5.12	1.92
Kansl1l	8.92	9.85	1.91
Scx	6.07	6.99	1.89
Cidec	5.86	6.77	1.88
Mreg	5.63	6.55	1.88
Muc1	5.53	6.43	1.87
Hrasls	4.58	5.48	1.87
Ccdc146	6.48	7.37	1.86
Cidea	6.08	6.98	1.86
Gm13304	7.18	8.06	1.83
Ccl21b; Gm13304	7.18	8.06	1.83
Sntn	5.51	6.37	1.81
Cbr2	9.61	10.46	1.8
1190003K10Rik	4.08	4.93	1.8
Gm1987; Ccl21a	7.78	8.62	1.79
Dlk1	6.12	6.96	1.79
Tnnt2	5.92	6.76	1.79
Ube2cbp	5.56	6.4	1.79
Wfdc15b	4.16	5	1.79
Olfr164	4.03	4.87	1.79
Gm5868	5.21	6.03	1.77
Grin3a	5.15	5.97	1.77
Sarm1	4.47	5.29	1.77
Gpr83	5.12	5.94	1.76
Pacrg	6.71	7.52	1.75
Prss53	5.95	6.76	1.75
Fam69c	5.6	6.41	1.75
Fabp4	8.98	9.79	1.74
Psca	6.72	7.52	1.74
Dynlrb2	6.28	7.08	1.74
Lrguk	5.69	6.49	1.74
Slc5a8	5.5	6.31	1.74
Aif1	5.4	6.2	1.74
Prrx2	6.09	6.88	1.73
Slc16a11	6.02	6.82	1.73
Cfap45	5.3	6.09	1.73
Cbr1	7.52	8.3	1.71
Trp63	5.19	5.97	1.71
1700025C18Rik	4.73	5.5	1.71
Aldh3b3	6.79	7.55	1.7
Spata18	6.23	6.99	1.7
Oit3	6.22	6.99	1.7
Mcidas	5.03	5.79	1.7
Shbg	4.71	5.47	1.7
Svopl	4.4	5.16	1.7
Gm13304	7.48	8.23	1.69
Ccl21c; Gm21541	7.48	8.23	1.69
Serpinb11	5.79	6.55	1.69
Rp1	4.94	5.7	1.69
Gm6614	4.21	4.96	1.69
Col3a1	6.7	7.45	1.68
Gm17175	5.55	6.29	1.68
Dcdc2c	4.99	5.74	1.68
Nox3	9.76	10.5	1.67
Mansc4	8.12	8.86	1.67
Mtap7d3	6.01	6.75	1.67
Glt8d2	5.79	6.52	1.67
Scn3a	5.72	6.46	1.67
Olfr1137	4.04	4.78	1.67
Lhfpl4	7.58	8.32	1.66
Gm13276	6.55	7.29	1.66
Lrrc23	5.69	6.42	1.66
Paox	4.93	5.66	1.66
Krt4	4.4	5.13	1.66
5430419D17Rik	8.01	8.73	1.65
Muc16	5.64	6.37	1.65
Fgf14	5.49	6.22	1.65
Uts2r	4.51	5.23	1.65
Map2	8.59	9.3	1.64
Thrsp	7.63	8.35	1.64
Kcnrg	6.84	7.56	1.64
1700024G13Rik	6.65	7.37	1.64
Ifi27l2a	6.35	7.06	1.64
Hmgcll1	6.08	6.79	1.64
Nme6	5.48	6.19	1.64
Slc6a16; RP23-289F7.2	5.41	6.12	1.64
Cebpe	6.44	7.14	1.63
Prss56	5.72	6.42	1.63
Zdhhc23	5.64	6.34	1.63
Pnliprp1	5.48	6.19	1.63
Ly6g	9.14	9.84	1.62
Slc4a3	6.56	7.26	1.62
Ephx2	6.52	7.22	1.62
Klk1b21	5.25	5.95	1.62
Dgkk	4.78	5.47	1.62
Dbh	4.57	5.26	1.62
Hcst	4.52	5.22	1.62
Ccl21a; Gm1987	7.55	8.24	1.61
Creb3l4	6.26	6.95	1.61
Htr3a	5.49	6.18	1.61
Vipr1	4.78	5.47	1.61
Fgf23	9.23	9.9	1.6
Gabra2	7.34	8.01	1.6
Spata24	6.85	7.53	1.6
Dnah11	6.52	7.2	1.6
Abcg5	5.6	6.28	1.6
Crisp2	4.74	5.42	1.6
Gm21773	4.15	4.83	1.6
Dgat2	7.32	7.98	1.59
Mir675; H19	6.71	7.38	1.59
Svop	5.81	6.48	1.59
Tcte1	5.72	6.38	1.59
Gm16223	5.35	6.01	1.59
Gm4925	5.11	5.78	1.59
Arhgap22	4.69	5.36	1.59
Pdzd9	4.46	5.13	1.59
Apln	4.17	4.83	1.59
Fabp7	9.67	10.33	1.58
Lrrtm4	7.96	8.61	1.58
Gpr89	7.11	7.78	1.58
D2hgdh	6.15	6.81	1.58
Lama5	6.12	6.78	1.58
Ins1	6.03	6.69	1.58
Rom1	6	6.66	1.58
Glyctk	5.47	6.13	1.58
Lhfpl1	5.43	6.09	1.58
Mixl1	5.31	5.97	1.58
Il25	5.17	5.83	1.58
Olfr235	4.26	4.92	1.58
Cyp2f2	10.02	10.67	1.57
Cdhr3	7.33	7.99	1.57
Atp6v1c2	7.01	7.67	1.57
Ly6k	6.7	7.35	1.57
Gm19670	6.14	6.79	1.57
Aard	6.04	6.68	1.57
Ulk4	5.98	6.63	1.57
Llgl1	5.7	6.35	1.57
Dthd1	5.63	6.28	1.57
Clic3	5.55	6.2	1.57
Cd209g	4.73	5.38	1.57
Lingo2	4.6	5.25	1.57
Defb47	4.26	4.91	1.57
Enkur	6.89	7.53	1.56
Upk1b	6.8	7.44	1.56
Cmbl	6.48	7.12	1.56
Prpf40b	6.48	7.12	1.56
Klhl38	6.32	6.96	1.56
Tff2	6.32	6.97	1.56
Matn4	6.27	6.91	1.56
Lmnb2	5.75	6.39	1.56
Ccdc68	5.63	6.27	1.56
Trim55	5.5	6.14	1.56
Tmem247	5.42	6.06	1.56
Hoxc12	4.24	4.88	1.56
Ubqlnl	4.11	4.76	1.56
Anapc7	6.62	7.26	1.55
Gsg1l2	6.49	7.12	1.55
Alx3	5.61	6.24	1.55
Cdcp1	5.57	6.21	1.55
Gm19345	5.43	6.07	1.55
Smpdl3b	5.39	6.03	1.55
Ctxn2	4.59	5.22	1.55
Gpr6	4.39	5.02	1.55
Kcnip2	7.08	7.7	1.54
Hlcs	6.17	6.8	1.54
Lca5l	5.96	6.59	1.54
Capn3	5.92	6.54	1.54
Vwa2	5.83	6.45	1.54
Stk32b	5.68	6.31	1.54
Neurl1b	5.12	5.74	1.54
Cbr3	5.09	5.71	1.54
Olfr1280	5.05	5.67	1.54
Bbof1	5.05	5.67	1.54
Usp27x	4.95	5.57	1.54
Gm20153	4.21	4.83	1.54
Gm3443	4.1	4.72	1.54
Zfpm2	7.27	7.89	1.53
Panx3	7.18	7.79	1.53
Pnmal1	6.8	7.41	1.53
Gpn2	6.55	7.16	1.53
Angptl6	6.5	7.11	1.53
Tectb; Mir6715	6.47	7.09	1.53
Kif26b	6.34	6.95	1.53
Fbxo16	5.97	6.58	1.53
Gm10134	5.5	6.11	1.53
Mfsd9	5.26	5.87	1.53
Ccr10	5.06	5.67	1.53
St6gal2	4.97	5.59	1.53
Ccdc106	4.89	5.5	1.53
Adam28	4.58	5.2	1.53
Olfr462; Olfr463	4.54	5.15	1.53
1700018C11Rik	4.5	5.11	1.53
Nps	4.32	4.93	1.53
Vnn1	4.24	4.86	1.53
Fam198b	9.31	9.91	1.52
Bambi	7.96	8.57	1.52
Wfdc18	7.59	8.2	1.52
Pou6f1	7.53	8.13	1.52
Ppp1r14a	7.06	7.67	1.52
Otx1	6.56	7.16	1.52
Pou3f2	6.25	6.86	1.52
Dnah6	5.83	6.44	1.52
Ang6	4.56	5.17	1.52
C3ar1	7.04	7.63	1.51
Ldlrad1	6.69	7.28	1.51
Hist2h2be	6.58	7.17	1.51
Myoz3	5.86	6.45	1.51
Sh2d1b2	5.66	6.26	1.51
Aoc1	5.61	6.2	1.51
Ccdc57	5.49	6.09	1.51
Gm21915	5.45	6.04	1.51
Mmp20	5.32	5.91	1.51
Cyp2d10	5.17	5.76	1.51
Rasl2-9	4.54	5.13	1.51
C2cd4b	4.53	5.13	1.51
Slc22a7	4.33	4.93	1.51
Ppp1r42	4	4.59	1.51
Tspan4	7.63	8.21	1.5
Snph	7.09	7.68	1.5
Nme9; 1600029I14Rik	6.84	7.42	1.5
Cntn4	6.53	7.11	1.5
Wfdc17	6.12	6.71	1.5
Sprr2a2; Sprr2a1	6.02	6.6	1.5
Chchd4	6.02	6.6	1.5
Hrc	5.9	6.49	1.5
Tsta3	5.79	6.38	1.5
AY358078	5.61	6.2	1.5
9930104L06Rik	5.39	5.97	1.5
Gm5087	5.37	5.96	1.5
Egflam	5.16	5.75	1.5
Stpg1	5	5.58	1.5
Col6a4	5	5.59	1.5
Gm10699	4.58	5.16	1.5
Pla2g4d	4.16	4.75	1.5
Ccl8	4.07	4.66	1.5
Oprd1	6.65	7.22	1.49
Xlr4a	6.65	7.22	1.49
Ak7	6.24	6.82	1.49
Hkdc1	6.12	6.69	1.49
Des	5.95	6.53	1.49
Zfp513	5.95	6.52	1.49
Efcab1	5.86	6.44	1.49
6030468B19Rik	5.56	6.14	1.49
Mt4	5.11	5.68	1.49
1700061G19Rik	4.89	5.46	1.49
Ntsr1	4.86	5.43	1.49
Ppp1r3a	4.61	5.19	1.49
Abhd16b	4.46	5.04	1.49
4930402F06Rik	4.03	4.61	1.49
Hspb6	9.13	9.69	1.48
Nme1	9.06	9.62	1.48
Cfap43	7.8	8.36	1.48
Nr4a1	7.37	7.93	1.48
Sertad4	6.34	6.9	1.48
Rspo4	5.96	6.53	1.48
Casp12	5.89	6.45	1.48
Rasd1	5.6	6.16	1.48
Cpxm1	5.48	6.05	1.48
Gdf2	5.36	5.93	1.48
Drd3	5.24	5.81	1.48
Gm10912	5.13	5.69	1.48
Atp13a4	4.79	5.35	1.48
Olfr554	4.78	5.34	1.48
Cfap57	4.68	5.25	1.48
Gm5136	4.64	5.2	1.48
Fthl17a	4.48	5.04	1.48
Erich6b	4.24	4.81	1.48
Fam92b	4.12	4.68	1.48
Otor	9.22	9.77	1.47
Capg	8.57	9.12	1.47
Gm14920	7.41	7.97	1.47
Rsph4a	7.38	7.94	1.47
Cdkl1	7.11	7.66	1.47
Mtmr11	6.27	6.82	1.47
Ttc21a	6.27	6.83	1.47
Hint2	6.13	6.68	1.47
Abca4	5.55	6.11	1.47
Dcst2	5.47	6.02	1.47
Dmrt1	5.41	5.97	1.47
Cpsf4l	5.39	5.95	1.47
Caly	5.32	5.88	1.47
Gpr176	5.2	5.75	1.47
Fam131c	4.99	5.54	1.47
Tmigd1	4.92	5.48	1.47
Evi5l	4.87	5.42	1.47
H2-M11	4.85	5.41	1.47
Nrep	7.94	8.49	1.46
Sphkap	7.45	8	1.46
Cldn3	7.38	7.92	1.46
Tspan6	7.24	7.79	1.46
Cldn24	6.92	7.47	1.46
Taf11	6.61	7.15	1.46
Lrrc71	6.52	7.06	1.46
Rpp25	6.29	6.84	1.46
Cthrc1	5.9	6.44	1.46
Wnt10b	5.77	6.32	1.46
Folr2	5.35	5.9	1.46
Ube2d4	4.99	5.54	1.46
Pitpnm3	4.85	5.4	1.46
Uchl4	4.76	5.3	1.46
Ppp1r36	4.76	5.31	1.46
Ccl12	4.61	5.15	1.46
Tpsg1	4.57	5.11	1.46
Dach2	4.33	4.87	1.46
Olfr854	4.1	4.65	1.46
1700093K21Rik	4.07	4.61	1.46
Rnase1	9.31	9.85	1.45
Ppp1r3c	7.97	8.5	1.45
Dapk2	7.34	7.88	1.45
Adcyap1r1	6.74	7.28	1.45
Tbc1d7	6.7	7.24	1.45
Bid	5.89	6.42	1.45
Epgn	5.69	6.23	1.45
Tm4sf5	5.69	6.22	1.45
Spint4	5.39	5.92	1.45
Cd209e	5.12	5.66	1.45
Olfr329-ps; Olfr330	5.1	5.64	1.45
Slc30a2	4.97	5.51	1.45
Olfr663	4.71	5.25	1.45
Adrb3	4.67	5.2	1.45
Olfr406	4.62	5.15	1.45
Krt13	4.6	5.14	1.45
Gm6811	4.6	5.14	1.45
Sbp	4.57	5.1	1.45
Gsdmcl1	4.42	4.96	1.45
Olfr517	4.3	4.84	1.45
Trat1	4.14	4.67	1.45
Chst8	8.11	8.64	1.44
Aprt	7.55	8.07	1.44
Acbd4	7.46	7.99	1.44
Tmco4	7.1	7.62	1.44
Asl	7.1	7.63	1.44
Pxdc1	7.06	7.59	1.44
Hdac6	7.02	7.55	1.44
Btbd6	7.01	7.54	1.44
Socs5	6.94	7.47	1.44
Trpm4	6.84	7.37	1.44
Cckar; Rnu7	6.67	7.2	1.44
Dmap1	6.56	7.09	1.44
Gm4944	6.31	6.84	1.44
Gm5627	5.92	6.45	1.44
Pced1b	5.83	6.35	1.44
Eno4	5.7	6.23	1.44
Gm9758	5.5	6.02	1.44
Klhl4	5.44	5.96	1.44
Vmn1r213	5.36	5.88	1.44
Tmem232	5.31	5.83	1.44
Atp6v1b1	5.04	5.57	1.44
Acsm5	4.89	5.42	1.44
Ak9	4.88	5.41	1.44
Lgals2	4.79	5.32	1.44
Klhl31	4.57	5.1	1.44
Pm20d1	4.45	4.98	1.44
AA414768	4.36	4.88	1.44
Gm20877	4.27	4.8	1.44
Cfap126	8.92	9.44	1.43
Srpx2	8.51	9.03	1.43
Aimp1	7.97	8.48	1.43
Sema3c	7.63	8.15	1.43
Efhc1	7.39	7.9	1.43
Mia	7.32	7.84	1.43
Mex3d	6.97	7.48	1.43
Slc26a5	6.74	7.26	1.43
Med26	6.48	6.99	1.43
Prdm6	5.74	6.25	1.43
A330041J22Rik	5.69	6.21	1.43
Aurkc	5.67	6.19	1.43
Gm26661	5.5	6.01	1.43
Gm10308	5.43	5.94	1.43
Gm8008	5.42	5.93	1.43
Rapgefl1	5.22	5.74	1.43
N4bp3	5.18	5.69	1.43
Sh2d1b1	5.08	5.6	1.43
Mc2r	5.05	5.57	1.43
Wnt5b	4.8	5.32	1.43
Gm128	4.79	5.31	1.43
4930452B06Rik	4.79	5.31	1.43
Erp27	4.56	5.07	1.43
Gcg	4.51	5.03	1.43
Fbxl13	4.31	4.82	1.43
Plet1	8.98	9.48	1.42
Gdf10	8.62	9.13	1.42
Vmo1	8.48	8.99	1.42
Tmem196	7.49	8	1.42
Fnip2	7.45	7.96	1.42
Odf3b	7.22	7.73	1.42
Slc46a1	6.72	7.23	1.42
Gm9994	6.5	7.01	1.42
Runx1t1	6.42	6.93	1.42
Iqcd	6.36	6.87	1.42
Bmp2	6.29	6.8	1.42
Zfp939	6.17	6.67	1.42
Cct7	6.16	6.67	1.42
E230029C05Rik	6.14	6.65	1.42
Kif7	6.08	6.59	1.42
Armc4	5.77	6.27	1.42
Cdk5rap1	5.76	6.27	1.42
Ehf	5.73	6.24	1.42
Krt14	5.68	6.18	1.42
Nexn	5.65	6.15	1.42
Slc39a4	5.45	5.96	1.42
Sftpd	5.1	5.61	1.42
Armc3	5.03	5.54	1.42
Svs2	4.97	5.47	1.42
Olfr1231	4.88	5.39	1.42
Olig1	4.86	5.36	1.42
Pnldc1	4.71	5.21	1.42
Guca1a	4.52	5.03	1.42
Olfr1491	4.41	4.92	1.42
Gm20777	4.39	4.9	1.42
Ms4a18	4.39	4.9	1.42
T2	4.22	4.73	1.42
Gm13119	4.15	4.66	1.42
Gm21887	9.79	10.29	1.41
Igfbp3	7.72	8.21	1.41
Cc2d2a	7.63	8.13	1.41
Akap1	7.31	7.81	1.41
Lypd2	7.13	7.63	1.41
Cd4	7.07	7.57	1.41
Ccdc39	6.77	7.26	1.41
Agbl2	6.3	6.8	1.41
Dnah5	6.01	6.51	1.41
Oas1f	5.88	6.38	1.41
Hgh1	5.72	6.21	1.41
Stmn4	5.47	5.96	1.41
Nkx2-9	5.32	5.82	1.41
Olfr1335	5.3	5.8	1.41
Hist1h1t	5.22	5.71	1.41
Gm7173	4.97	5.46	1.41
1700017N19Rik	4.4	4.89	1.41
Map3k19	4.34	4.83	1.41
Slc6a9	4.3	4.8	1.41
Defa22	4.28	4.78	1.41
Vmn2r124	4.04	4.53	1.41
Bcas1	9	9.48	1.4
Sostdc1	7.78	8.27	1.4
Asb1	7.56	8.04	1.4
Gas8	7.56	8.05	1.4
Cfap44	7.56	8.05	1.4
Fkbpl	7.18	7.67	1.4
Zcchc14	7.15	7.63	1.4
Serpina11	7.02	7.5	1.4
Sh3tc2	6.96	7.44	1.4
Mlana	6.93	7.41	1.4
Il17rd	6.7	7.18	1.4
Fastkd3	6.68	7.16	1.4
Zfp697	6.67	7.16	1.4
Syt14	6.66	7.15	1.4
Lhb	6.5	6.98	1.4
Thumpd1	6.32	6.8	1.4
Mir322; Mir351; Mir503; C430049B03Rik	6.16	6.65	1.4
Zc3h12b	6.08	6.57	1.4
Dux	6.04	6.52	1.4
Pitx2	5.94	6.42	1.4
Zfp454	5.81	6.3	1.4
Slc22a13b-ps	5.78	6.27	1.4
Vgf	5.66	6.15	1.4
Wfikkn2	5.49	5.97	1.4
Klhdc9	5.19	5.68	1.4
Mtm1	5.11	5.59	1.4
Lrriq1	5	5.48	1.4
Palm3	4.99	5.48	1.4
Mageb2; Mageb1	4.97	5.45	1.4
Fuz	4.94	5.42	1.4
Olfr457	4.87	5.36	1.4
Svs1	4.78	5.26	1.4
Cyp2j7	4.63	5.12	1.4
Amdhd1	4.52	5.01	1.4
Mgat5b	4.36	4.85	1.4
Gm5938	4.31	4.79	1.4
Ccdc89	4.06	4.55	1.4
Pcolce	8.85	9.32	1.39
Acyp2	8.44	8.91	1.39
Lgi2	8.38	8.85	1.39
Sec14l3	8.02	8.5	1.39
Irs1	7.77	8.25	1.39
Klk6	7.75	8.23	1.39
Klhdc8a	7.72	8.2	1.39
Guk1	7.7	8.17	1.39
Ogfod3	7.59	8.07	1.39
Cdc14b	7.46	7.93	1.39
Pwwp2b	7.4	7.88	1.39
Arg2	7.39	7.86	1.39
Daxx	7.35	7.83	1.39
Retsat	7.17	7.65	1.39
Ubxn10	7.12	7.6	1.39
Slc25a45	7.07	7.54	1.39
Izumo4	7.04	7.51	1.39
Tmem241	6.75	7.23	1.39
Stc2	6.56	7.03	1.39
Zfp777	6.51	6.98	1.39
Myh14	6.48	6.96	1.39
Scara5	6.32	6.8	1.39
Pcdhb12	6.29	6.77	1.39
Egf	6.21	6.68	1.39
Slc16a12	6.13	6.6	1.39
Prok2	6.11	6.59	1.39
Cutc	6.01	6.49	1.39
Dcun1d3	5.94	6.41	1.39
Atp6ap1l	5.9	6.38	1.39
Gck	5.71	6.18	1.39
Zkscan2	5.67	6.15	1.39
Pdss1	5.62	6.1	1.39
A930017M01Rik; 2310069G16Rik	5.59	6.06	1.39
Ror2	5.41	5.89	1.39
Gm2964	5.38	5.86	1.39
Cryaa	5.31	5.78	1.39
Hgd	5.26	5.74	1.39
4932411E22Rik	5.21	5.69	1.39
Zfp82	5.1	5.58	1.39
Mageb1; Mageb2	4.97	5.45	1.39
Gm6465	4.85	5.32	1.39
Kdm4d	4.68	5.16	1.39
Spink11	4.6	5.07	1.39
Dcpp3	4.57	5.05	1.39
Stk32c	4.41	4.88	1.39
Lep	4.35	4.82	1.39
Mdh1b	4.06	4.54	1.39
Snrpd3	8.52	8.98	1.38
Prrg4	8.35	8.81	1.38
Uqcr10	8.31	8.77	1.38
Tnfrsf12a	8.1	8.57	1.38
Zfp358	8.09	8.56	1.38
Gpd1	7.96	8.43	1.38
Slc25a25	7.91	8.38	1.38
Pigz	7.88	8.35	1.38
Thbs2	7.7	8.16	1.38
Mfi2	7.61	8.08	1.38
S100a6	7.48	7.94	1.38
Ntsr2	7.37	7.84	1.38
Nradd	7.34	7.8	1.38
Pex1	7.07	7.53	1.38
Tmem255b	6.71	7.17	1.38
Flnc	6.43	6.89	1.38
Espnl	6.42	6.89	1.38
Ecel1	6.41	6.88	1.38
Dnajc12	6.39	6.85	1.38
Mag	6.24	6.71	1.38
Slc45a3	5.99	6.45	1.38
Borcs5	5.99	6.45	1.38
Plch1	5.97	6.43	1.38
Foxred2	5.93	6.4	1.38
Gm21905	5.81	6.27	1.38
Gdf5	5.6	6.06	1.38
9630028B13Rik	5.57	6.04	1.38
Agrp	5.53	6	1.38
Tmem114	5.46	5.92	1.38
Pxmp2	5.38	5.84	1.38
Mylpf	5.36	5.82	1.38
4930549C01Rik	5.16	5.62	1.38
Piwil4	5.02	5.48	1.38
Fut1	4.92	5.38	1.38
Tsnaxip1	4.79	5.25	1.38
Olfr1288	4.37	4.83	1.38
Olfr1366	4.21	4.67	1.38
Gm5592	4.06	4.53	1.38
Bglap2	11.15	11.61	1.37
Ermp1	8.45	8.91	1.37
Slc25a19	8.2	8.65	1.37
Lgi3	8.15	8.61	1.37
Hyi	8	8.45	1.37
S1pr1	7.99	8.44	1.37
Pfkfb4	7.56	8.01	1.37
Eva1b	7.38	7.84	1.37
Triqk	7.36	7.82	1.37
Mecom	7.22	7.67	1.37
Scarf2	7.21	7.66	1.37
Fam214b	6.98	7.44	1.37
Ptgfr	6.83	7.28	1.37
Echdc2	6.83	7.29	1.37
Avil	6.64	7.1	1.37
Tef	6.54	6.99	1.37
Bche	6.25	6.7	1.37
Slc39a12	6.23	6.68	1.37
Xylb	6.17	6.62	1.37
Adgrg5	6.16	6.61	1.37
Hrh3	5.88	6.33	1.37
Nwd1	5.81	6.27	1.37
Cep72	5.72	6.17	1.37
Slc25a18	5.48	5.93	1.37
Slc27a6	5.28	5.73	1.37
9430069I07Rik	5.27	5.72	1.37
BC025446	5.2	5.65	1.37
Rps6kl1	5.01	5.47	1.37
Olfr1415	4.98	5.44	1.37
4930572O03Rik	4.95	5.4	1.37
Crygd	4.84	5.29	1.37
H2-M5	4.78	5.24	1.37
Defb3	4.71	5.17	1.37
Gm6792	4.7	5.15	1.37
Defb18	4.67	5.12	1.37
Gad2	4.56	5.02	1.37
Il22ra2	4.55	5	1.37
Spata45	4.22	4.68	1.37
Olfr1286	4.21	4.66	1.37
Kcne4	4.15	4.6	1.37
Rbm3	11.24	11.69	1.36
Pde4d; Mir1904	9.44	9.88	1.36
Agpat2	9.25	9.7	1.36
Rnd2	8.95	9.39	1.36
Fzd2	8.77	9.22	1.36
Sfrp1	8.27	8.71	1.36
Itgbl1	8.07	8.51	1.36
Npcd; Cbx6; Nptxr	7.73	8.18	1.36
Inadl	7.51	7.96	1.36
D1Ertd622e	7.4	7.84	1.36
Atoh8	7.35	7.79	1.36
Tomt	7.33	7.77	1.36
AU021092	7.16	7.6	1.36
Gpatch4	7.03	7.48	1.36
Fitm2	7.02	7.46	1.36
Cyp2e1	6.8	7.24	1.36
Gm9639	6.72	7.17	1.36
Fbxl6	6.62	7.06	1.36
B3galt2	6.56	7	1.36
Agr3	6.52	6.96	1.36
Med29	6.46	6.9	1.36
Gm6899	6.35	6.79	1.36
Atp5k	6.32	6.76	1.36
Dnaaf1	6.22	6.66	1.36
Rxrg	6.18	6.63	1.36
Tas1r3	6.04	6.48	1.36
Hs3st3a1	5.62	6.06	1.36
Gm17079	5.51	5.95	1.36
Nlrp6	5.5	5.94	1.36
Trim46	5.43	5.87	1.36
Fbp2	5.32	5.76	1.36
Clcn1	4.8	5.24	1.36
Kcne2	4.76	5.2	1.36
Ccdc70	4.45	4.89	1.36
Lgals12	4.42	4.86	1.36
Cldn34b2	4.29	4.73	1.36
Hoxb13	4.19	4.63	1.36
Olfr53	4.09	4.54	1.36
Socs2	9.55	9.98	1.35
Ctsz	9.4	9.83	1.35
Vcan	8.12	8.56	1.35
Inpp1	8.09	8.53	1.35
Dnajc4	7.96	8.39	1.35
Rab5b	7.93	8.36	1.35
Lage3	7.66	8.09	1.35
Fat4	7.65	8.08	1.35
Fbxo6	7.63	8.06	1.35
Ccs	7.61	8.04	1.35
Pcdh18	7.59	8.02	1.35
Chmp1a	7.48	7.91	1.35
Hpgds	7.33	7.76	1.35
Asb2	7.3	7.73	1.35
Apex1	7.17	7.6	1.35
Ptpmt1	7.04	7.48	1.35
Rprm	6.97	7.41	1.35
Pnck	6.97	7.4	1.35
Lrrc75a	6.92	7.35	1.35
Rap1gap2	6.66	7.09	1.35
Asprv1	6.64	7.07	1.35
Efcab6	6.64	7.07	1.35
Cadm2	6.56	6.99	1.35
Lrtm2	6.3	6.73	1.35
Layn	6.07	6.5	1.35
Arhgap40	6.05	6.49	1.35
Kcnj3	6.02	6.45	1.35
Cyp4f14	5.99	6.42	1.35
Ptchd1	5.9	6.33	1.35
Lrrc4	5.85	6.28	1.35
Mat1a	5.76	6.19	1.35
Plekhg6	5.5	5.93	1.35
Barhl2	5.44	5.87	1.35
Lrrc74b	5.43	5.86	1.35
Ddc	5.42	5.85	1.35
Pinlyp	5.4	5.83	1.35
Dlx6os2	5.39	5.82	1.35
Mylk2	5.31	5.75	1.35
Nppa	5.16	5.6	1.35
Myt1l	5.14	5.57	1.35
Defb9	5.07	5.5	1.35
LOC100504702	4.97	5.4	1.35
Prss41	4.82	5.25	1.35
Gm3512	4.77	5.2	1.35
Mafa	4.74	5.18	1.35
Clec4a4	4.65	5.09	1.35
Gm16833	4.59	5.02	1.35
Gm25380; Gm3552	4.57	5	1.35
Rnf151	4.53	4.97	1.35
4933402D24Rik	4.33	4.77	1.35
Il23r	4.13	4.56	1.35
Aldoc	10.23	10.65	1.34
Bglap3	9.95	10.37	1.34
Clic5	9.14	9.56	1.34
Rbp4	8.96	9.39	1.34
Arhgef28	8.85	9.27	1.34
Ech1	8.75	9.17	1.34
Gas2l1	8.46	8.88	1.34
Lmx1a	8.22	8.64	1.34
A230050P20Rik	7.94	8.36	1.34
Muc15	7.77	8.19	1.34
Rab34	7.69	8.12	1.34
Ubqln4	7.47	7.89	1.34
Cldn15	7.43	7.85	1.34
Mea1	7.43	7.85	1.34
Krt8	7.21	7.64	1.34
2010107G23Rik	7.15	7.57	1.34
Tecpr2	7.14	7.56	1.34
Gm11709	7.13	7.55	1.34
Fscn1	7.12	7.54	1.34
Mamdc4	7.07	7.49	1.34
Tnfrsf22	7.01	7.43	1.34
Fto	6.99	7.42	1.34
Oscp1	6.94	7.36	1.34
R3hcc1	6.81	7.23	1.34
Sdhaf3	6.79	7.22	1.34
Igdcc4	6.68	7.11	1.34
Rgs16	6.61	7.03	1.34
Cep76	6.54	6.96	1.34
Pter	6.46	6.89	1.34
Car5b	6.42	6.84	1.34
Gm904	6.41	6.83	1.34
Fer1l4	6.35	6.77	1.34
Magi2	6.24	6.66	1.34
Sox21	6.06	6.48	1.34
Gm10600	6.05	6.47	1.34
Tcp10b; Tcp10a	6.05	6.46	1.34
Gm13275; Gm13285	6.04	6.47	1.34
1700048O20Rik	6.01	6.44	1.34
Ptpro	5.94	6.37	1.34
Fabp5	5.86	6.28	1.34
Rgs22	5.84	6.26	1.34
Zc3h8	5.71	6.13	1.34
9130008F23Rik	5.66	6.08	1.34
Gm10061	5.6	6.02	1.34
4930426L09Rik	5.57	5.98	1.34
Cst6	5.49	5.91	1.34
Setd4	5.48	5.9	1.34
Has2	5.39	5.81	1.34
Mmp17	5.17	5.59	1.34
Trim54	5.08	5.5	1.34
Tcstv1	5.04	5.46	1.34
1700007B14Rik	5.02	5.45	1.34
LOC102637808	5	5.42	1.34
Gm6314	4.99	5.41	1.34
Sstr2	4.94	5.36	1.34
Tmc2	4.92	5.34	1.34
Dok6	4.92	5.34	1.34
Krtap14	4.85	5.28	1.34
Trpd52l3	4.8	5.22	1.34
Xcr1	4.77	5.19	1.34
Esr2	4.76	5.19	1.34
Olfr15	4.76	5.18	1.34
Lrp2bp	4.67	5.1	1.34
Gm694	4.58	5	1.34
Trpc7	4.58	5	1.34
Spag16	4.55	4.97	1.34
Als2cl	4.55	4.97	1.34
Gabrr3	4.49	4.92	1.34
Dear1	4.45	4.88	1.34
Taar4	4.44	4.86	1.34
Lect2	4.31	4.74	1.34
Ggt6	4.27	4.7	1.34
Klf14	4.12	4.55	1.34
Gm3952	4.1	4.52	1.34
Rbp1	11.02	11.43	1.33
Hey1	8.58	9	1.33
Lpl	8.57	8.98	1.33
Atp9a	8.25	8.65	1.33
Mfsd2a	7.94	8.36	1.33
Fam162a	7.79	8.2	1.33
Anks1b	7.55	7.96	1.33
Pla2g6	7.55	7.96	1.33
Tnks1bp1	7.44	7.85	1.33
Adck1	7.4	7.81	1.33
Gm5617	7.37	7.78	1.33
Gm8247	7.28	7.69	1.33
Pecr	7.17	7.58	1.33
Abhd10	7.01	7.42	1.33
Baiap2l1	6.99	7.4	1.33
Cyp4a12b	6.98	7.39	1.33
Adgrb3	6.92	7.34	1.33
Pop5	6.89	7.3	1.33
Tcf7	6.88	7.29	1.33
Pcx	6.87	7.29	1.33
Cldn4	6.86	7.27	1.33
Smim8	6.73	7.14	1.33
Dnah12	6.71	7.12	1.33
4933440N22Rik	6.57	6.99	1.33
Nkx2-4	6.53	6.95	1.33
Dab1	6.47	6.88	1.33
Defb33	6.34	6.75	1.33
Arhgef40	6.33	6.74	1.33
3425401B19Rik	6.13	6.54	1.33
Abcc8	6.03	6.44	1.33
Ttc26	5.99	6.4	1.33
Mmd	5.93	6.34	1.33
Kcnj6	5.81	6.22	1.33
Srsf12	5.77	6.18	1.33
Cacna1g	5.74	6.15	1.33
Krt25	5.67	6.08	1.33
Sall3	5.58	5.99	1.33
Inhbe	5.54	5.95	1.33
Sybu	5.45	5.86	1.33
Meig1	5.42	5.84	1.33
Hspb11	5.41	5.83	1.33
Cstl1	5.38	5.8	1.33
Gm11992	5.31	5.72	1.33
Mup2; Mup10; Mup11; Mup1	5.27	5.68	1.33
Sox3	5.24	5.66	1.33
Lin28b	5.18	5.6	1.33
Dppa3	4.57	4.98	1.33
Miox	4.53	4.94	1.33
Olfr231	4.38	4.8	1.33
Gm853	4.31	4.73	1.33
Tas2r119	4.19	4.61	1.33
Nrk	4.17	4.58	1.33
Olfr98	4.15	4.56	1.33
Nr1d1	9.77	10.17	1.32
Ilf2	8.97	9.37	1.32
Tagln3	8.66	9.06	1.32
Cenpv	8.27	8.67	1.32
Cd109	8.26	8.66	1.32
Gstz1	8.2	8.6	1.32
Crip1	8.05	8.46	1.32
Otog	8.02	8.42	1.32
Nfs1	7.97	8.37	1.32
G0s2	7.94	8.33	1.32
Rab36	7.64	8.04	1.32
Bmper	7.49	7.89	1.32
Amy1	7.43	7.84	1.32
Nqo1	7.43	7.83	1.32
Srebf1; Mir6922	7.4	7.81	1.32
Pgs1	7.37	7.77	1.32
Selenbp1	7.3	7.7	1.32
Pmvk	7.27	7.67	1.32
Dsp	7.27	7.67	1.32
Zfp821	7.23	7.63	1.32
Atp5e	7.02	7.42	1.32
Wars2	6.96	7.36	1.32
Socs7	6.91	7.31	1.32
Lpar3	6.9	7.3	1.32
Rgs9	6.75	7.16	1.32
Pax9	6.69	7.08	1.32
Pard6a	6.62	7.02	1.32
Exd1	6.59	6.99	1.32
Ins2	6.58	6.97	1.32
Pithd1	6.55	6.95	1.32
Htr2a	6.47	6.87	1.32
Slc2a10	6.38	6.79	1.32
Fhod3	6.34	6.74	1.32
Lif	6.3	6.7	1.32
Eef2kmt	6.26	6.66	1.32
Gm11213	6.23	6.63	1.32
Resp18	6.19	6.58	1.32
Gm9954	6.18	6.57	1.32
Taar7e	6.13	6.54	1.32
Ddx51	5.67	6.07	1.32
Fam47e	5.6	6	1.32
Nek10	5.51	5.91	1.32
Cxcl11	5.44	5.84	1.32
AW011738	5.43	5.83	1.32
Gm16500	5.36	5.76	1.32
Inca1	5.28	5.67	1.32
Gm5129	5.26	5.66	1.32
B130006D01Rik	5.08	5.48	1.32
Gm11541	4.98	5.39	1.32
9130230L23Rik	4.96	5.36	1.32
Gm6471	4.93	5.33	1.32
Bmp15	4.76	5.16	1.32
H2-M9	4.56	4.96	1.32
Lalba	4.51	4.91	1.32
Adamts16	4.49	4.88	1.32
Rgs9bp	4.43	4.83	1.32
Olfr242; Olfr27	4.43	4.83	1.32
Gp2	4.41	4.81	1.32
Lce1l	4.28	4.68	1.32
Ttc6	4.18	4.59	1.32
Ppef2	4.14	4.55	1.32
Gm11397	4.09	4.5	1.32
Olfr1155	4.08	4.48	1.32
Myh15	4.04	4.43	1.32
Bcam	9.51	9.9	1.31
Cd177	9.22	9.61	1.31
Arfip2	9.04	9.43	1.31
Ndufa10	9	9.39	1.31
Mmp14	8.98	9.37	1.31
Ppp1r21	8.88	9.27	1.31
Mcoln3	8.78	9.17	1.31
Chga	8.78	9.17	1.31
F3	8.61	9	1.31
Fam180a	8.35	8.74	1.31
Psmc5	8.28	8.67	1.31
Nbea	8.08	8.47	1.31
Mfge8	8.08	8.47	1.31
Zfp655	8.01	8.4	1.31
Map2k3	7.8	8.19	1.31
Sel1l3	7.36	7.74	1.31
Bak1	7.36	7.75	1.31
Ubtd2	7.35	7.74	1.31
Atp13a5	7.3	7.69	1.31
Fcrlb	7.14	7.53	1.31
Fez1	7.14	7.53	1.31
Tmem252	7.07	7.46	1.31
Rnf111	7.04	7.43	1.31
Ntn1	7.02	7.4	1.31
Lyzl4	6.92	7.32	1.31
Dip2c	6.91	7.3	1.31
Mthfsd	6.9	7.29	1.31
Wrap73	6.72	7.11	1.31
Ttc23l	6.67	7.06	1.31
Sptlc3	6.61	7.01	1.31
Tnk1	6.6	6.99	1.31
Zcchc3	6.58	6.98	1.31
Tyro3	6.43	6.82	1.31
Tbc1d16	6.41	6.8	1.31
Pemt	6.36	6.75	1.31
Cacna2d3	6.3	6.69	1.31
C4a	6.15	6.55	1.31
Trem2	6.14	6.54	1.31
Pcdhb14	6.02	6.42	1.31
Ccdc185	5.86	6.24	1.31
Tkfc	5.79	6.18	1.31
Plin1	5.75	6.15	1.31
Fam216b	5.75	6.14	1.31
Ptcd1	5.72	6.11	1.31
Krtap16-1	5.65	6.04	1.31
Dlx6	5.55	5.94	1.31
Zbtb32	5.55	5.94	1.31
Mycs	5.53	5.93	1.31
Asb14	5.5	5.9	1.31
Fam167b	5.48	5.87	1.31
Ninj2	5.37	5.76	1.31
Krt19	5.3	5.68	1.31
Olfr1261	5.28	5.67	1.31
Gm10674	5.2	5.58	1.31
AU016765	5.16	5.55	1.31
Olfr433	5.12	5.52	1.31
Icam5	5.02	5.41	1.31
Mog	5.01	5.39	1.31
Areg	4.9	5.29	1.31
Npbwr1	4.89	5.28	1.31
Mup20	4.83	5.22	1.31
Pydc3	4.63	5.02	1.31
Olfr279	4.57	4.96	1.31
Zap70	4.51	4.9	1.31
Zmynd12	4.44	4.84	1.31
Gm6902	4.38	4.77	1.31
Amtn	4.31	4.7	1.31
Sult1c2	4.28	4.66	1.31
Wnt2	4.27	4.66	1.31
Fam163a	4.13	4.52	1.31
Muc3	4.07	4.46	1.31
Olfr850	4.07	4.46	1.31
Zp3r	4.06	4.45	1.31
Bloc1s1	10.55	10.93	1.3
Kcnj10	10.08	10.46	1.3
Slc6a6	10.03	10.41	1.3
Tesk1	9.76	10.14	1.3
Itm2c	9.75	10.12	1.3
Mmp2	9.74	10.13	1.3
Gstm2	9.47	9.84	1.3
Ackr3	8.87	9.25	1.3
Sv2a	8.83	9.21	1.3
Naaa	8.57	8.95	1.3
Krt7	8.56	8.94	1.3
Pfdn6	8.54	8.91	1.3
Gstt3	8.41	8.79	1.3
Mrpl40	8.41	8.79	1.3
Kctd6	8.3	8.68	1.3
Serhl	8.19	8.57	1.3
Cstb	8.17	8.54	1.3
Gstt1	8.07	8.45	1.3
Gpr37	7.88	8.26	1.3
Vimp	7.87	8.25	1.3
Txlna	7.86	8.23	1.3
2810428I15Rik	7.84	8.21	1.3
Ccm2	7.81	8.19	1.3
Acy3	7.81	8.19	1.3
Clcn7	7.76	8.13	1.3
Tdrd7	7.72	8.1	1.3
Ift43	7.69	8.06	1.3
Zfp182	7.57	7.94	1.3
Ddit4	7.53	7.91	1.3
Pcbd1	7.32	7.69	1.3
Bpnt1	7.18	7.56	1.3
Arvcf	7.15	7.53	1.3
Aspn	7.14	7.51	1.3
Spata6	7.13	7.51	1.3
Gfra4; Mir6973b	7.08	7.46	1.3
Col15a1	7.06	7.44	1.3
C87436	7.03	7.41	1.3
Efcab11	7.03	7.41	1.3
Sox2	6.98	7.36	1.3
Dpcd	6.98	7.37	1.3
Vwa3a	6.95	7.33	1.3
Ldhd	6.92	7.3	1.3
Qk	6.89	7.26	1.3
C130074G19Rik	6.87	7.25	1.3
Pax3	6.78	7.16	1.3
AU040972	6.78	7.16	1.3
2610524H06Rik	6.67	7.04	1.3
Fam110c	6.47	6.85	1.3
Nog	6.45	6.83	1.3
Nfatc4	6.41	6.79	1.3
Gins2	6.29	6.67	1.3
Klhl35	6.28	6.66	1.3
Nek5	6.24	6.61	1.3
Mamstr	6.13	6.5	1.3
Angel1	6.11	6.48	1.3
Cdkl2	5.95	6.33	1.3
Dnaaf3	5.93	6.31	1.3
Dnah7c	5.85	6.24	1.3
Tmem91	5.81	6.19	1.3
Ttf2	5.76	6.14	1.3
Tnfrsf8	5.7	6.08	1.3
Gm1587	5.69	6.08	1.3
Kmo	5.65	6.02	1.3
1700007G11Rik	5.65	6.02	1.3
Ankmy1	5.62	5.99	1.3
Clec3a	5.61	5.99	1.3
Ccdc27	5.52	5.9	1.3
Taar6	5.51	5.89	1.3
Gm9962	5.48	5.85	1.3
Tm6sf2	5.36	5.74	1.3
Gm2518	5.32	5.7	1.3
A730071L15Rik	5.23	5.61	1.3
Krt33a	5.2	5.58	1.3
AI429214	5.19	5.57	1.3
Olfr1347	5.08	5.47	1.3
Gm2854	5.05	5.43	1.3
BC089491	5.04	5.42	1.3
Krt23	5.01	5.39	1.3
Arhgap36	4.98	5.35	1.3
Tnfrsf17	4.96	5.33	1.3
Gm9326	4.9	5.27	1.3
Gm21812	4.88	5.25	1.3
Clec4g	4.83	5.2	1.3
Gm10697; Tdpoz5	4.81	5.19	1.3
Gm10697	4.81	5.19	1.3
Gpr150	4.72	5.1	1.3
Gm7168	4.7	5.08	1.3
Tescl	4.69	5.07	1.3
Olfr631	4.67	5.05	1.3
Slc5a4a	4.42	4.8	1.3
Ascl2	4.4	4.78	1.3
Ttc30a2; Ttc30a1	4.09	4.46	1.3
Genes downregulated in the Fus1 KO cochlea
Gene name	Intensity	Intensity	Fold change
	WT (log)	KO (log)	KO/WT (linear)
Pop4	10.48	9.27	-2.32
Epx	9.34	8.17	-2.24
Iqcf3	5.01	3.87	-2.2
Pnma1	7.6	6.5	-2.14
Xlr5c	5.16	4.07	-2.13
Ear7; Ear6	9.33	8.27	-2.08
Ear10	8.79	7.74	-2.08
Gm21738	9.87	8.84	-2.05
Ear1	10.43	9.41	-2.02
Tac2	6.51	5.52	-1.99
Ccr3	7.26	6.27	-1.98
Bdnf	6.19	5.21	-1.96
Ear12; Ear2; Ear3	9.65	8.68	-1.95
Gm765	7.45	6.48	-1.95
Dgkh	7.42	6.48	-1.91
Cd163	7.06	6.13	-1.91
Bank1	8.23	7.31	-1.89
Il5ra	5.92	5.01	-1.89
Gm19684; EG547347	4.88	3.96	-1.89
Gm7068	7.44	6.53	-1.88
Pcdhb21; Pcdhb22	5.97	5.06	-1.88
Tusc2	6.7	5.79	-1.87
Gm1995	6.59	5.69	-1.87
Ccr9	5.45	4.55	-1.87
Sirpb1a	9.36	8.47	-1.86
Pomc	7.92	7.03	-1.85
Apol11a	6.59	5.7	-1.85
Card11	5.25	4.36	-1.85
Gm21893	5.12	4.23	-1.85
Ikzf3	6.74	5.86	-1.84
Trim5	5.76	4.87	-1.84
Gm5444	4.73	3.85	-1.83
Abcg3	6.79	5.93	-1.82
Tceanc2	8.39	7.53	-1.81
Pirt	7.36	6.5	-1.81
Oprm1	6.3	5.45	-1.81
Lce6a	5.24	4.38	-1.81
Calca	6.45	5.61	-1.8
Il1rn	7.86	7.03	-1.78
Tceanc	6.29	5.46	-1.78
Gm428	4.88	4.05	-1.78
Gm11239	4.8	3.97	-1.78
Tnfsf4	4.7	3.87	-1.78
Scn10a	5.73	4.91	-1.77
Pisd-ps3	10.02	9.2	-1.76
Apitd1	7.09	6.28	-1.76
Akr1c14	6.91	6.1	-1.75
Cnpy1	4.89	4.08	-1.75
Irf4	6.01	5.21	-1.74
Cel	5.98	5.18	-1.74
Gm8113	9.05	8.26	-1.73
Adgre4	7.29	6.5	-1.73
Serpina1c	5.85	5.07	-1.72
Dspp	4.87	4.09	-1.72
1700025F22Rik	4.18	3.41	-1.71
Sult1e1	5.56	4.8	-1.7
Gm7932	5.18	4.41	-1.7
Gm17404	4.93	4.17	-1.7
Acta1	7.92	7.16	-1.69
Fbxo48	4.71	3.95	-1.69
Socs6	4.69	3.93	-1.69
Rhbg; Tsacc	7.42	6.68	-1.68
Trdn	6.34	5.59	-1.68
Rhox2d	4.81	4.07	-1.68
Adam30	5.29	4.55	-1.67
Gm17651	4.22	3.49	-1.67
Pou4f1	6.66	5.93	-1.66
Zfp81	6.61	5.88	-1.66
Fbxw14	5.54	4.81	-1.66
Ucp3	5.46	4.73	-1.66
Egr1	9.7	8.97	-1.65
Pyhin1	8.08	7.35	-1.65
H2-Q8; H2-Q6	7.13	6.41	-1.65
Cldn22	6.94	6.21	-1.65
Gm16432	6.81	6.09	-1.65
Rhox5	5.81	5.09	-1.65
Malrd1	4.67	3.95	-1.65
Ptpn22	7.25	6.54	-1.64
Tgif2lx2; Tgif2lx1	5.13	4.42	-1.64
BC061195; 1700003E24Rik	4.85	4.14	-1.64
Alox15	7.96	7.25	-1.63
Atp6v0a4	7.1	6.4	-1.63
Cd3e	6.88	6.17	-1.63
Sgsm2	6.61	5.91	-1.63
Mbl1	5.79	5.09	-1.63
Cth	5.7	5	-1.63
Gm9930	4.94	4.23	-1.63
Pramel6	4.09	3.39	-1.63
Zfp940	5.75	5.06	-1.62
Foxr1	5.28	4.58	-1.62
Gm11237; LOC101055863; LOC100862015; Gm11236	5.02	4.32	-1.62
Ret	7.92	7.23	-1.61
Mfap5	6.52	5.82	-1.61
Ifi202b; Ifi205	6.3	5.61	-1.61
Ifna14	5.89	5.2	-1.61
Ccdc18	5.73	5.05	-1.61
Sdr9c7	5.28	4.6	-1.61
Ccr1l1	4.68	3.99	-1.61
Gm5771	4.46	3.78	-1.61
Bach2	8.01	7.33	-1.6
Aspdh	7.12	6.45	-1.6
Slc25a48	6.99	6.31	-1.6
Ttn	6.72	6.05	-1.6
Higd1b	5.86	5.18	-1.6
Tmem217	5.24	4.57	-1.6
Prg2	11.33	10.65	-1.59
Pno1	7.96	7.29	-1.59
Psd4	7.57	6.9	-1.59
Bsn	7.12	6.45	-1.59
Zfp709	5.86	5.19	-1.59
Mst1	5.69	5.02	-1.59
Gm10772	4.89	4.23	-1.59
Gm10719	11.61	10.95	-1.58
Kpna4	7.62	6.96	-1.58
Slfn5	7.14	6.48	-1.58
Tnfrsf9	6.17	5.52	-1.58
Ccr6	5.83	5.17	-1.58
Arl9	5.33	4.67	-1.58
Syt6	5.32	4.66	-1.58
Mmp27	5.04	4.38	-1.58
Hoxb6	4.73	4.07	-1.58
Olfr597	4.72	4.06	-1.58
Rgs21	4.18	3.52	-1.58
Mamdc2	7.49	6.84	-1.57
6720489N17Rik	7.32	6.67	-1.57
Zdhhc5	6.97	6.31	-1.57
Camk2a	6.73	6.08	-1.57
Stag3	6.47	5.82	-1.57
Gm21645	6.03	5.38	-1.57
Olfr618	5.92	5.27	-1.57
Mroh2b	5.76	5.11	-1.57
Spx	5.16	4.5	-1.57
Pdcd1	4.99	4.34	-1.57
Tlr11	4.83	4.17	-1.57
Olfr371	4.12	3.47	-1.57
Gm15446	9.72	9.07	-1.56
Rapgef6	9.71	9.06	-1.56
Cd79a	9.15	8.51	-1.56
Fgr	7.92	7.28	-1.56
Pcp2	7.82	7.18	-1.56
1600014C10Rik	7.71	7.07	-1.56
Blnk	7.42	6.78	-1.56
Pou2af1	6.77	6.14	-1.56
Plxdc1	5.68	5.03	-1.56
Scn11a	5.28	4.64	-1.56
Olfr1278	4.58	3.94	-1.56
Prss1	4.45	3.81	-1.56
Zfp932	9.7	9.07	-1.55
Spc25	7.99	7.36	-1.55
Cd19	7.6	6.97	-1.55
Cela3b	6.79	6.16	-1.55
Apool	6.22	5.59	-1.55
Krt32	5.26	4.63	-1.55
Ccin	5.22	4.59	-1.55
Tyw5	6.6	5.98	-1.54
Sftpa1	6.49	5.87	-1.54
Pax5	6.39	5.77	-1.54
1700037C18Rik	6.22	5.59	-1.54
1700011M02Rik	5.98	5.36	-1.54
Cyp2c65	5.21	4.59	-1.54
Olfr191	4.87	4.24	-1.54
Fbxw16	4.74	4.12	-1.54
Dio3	4.13	3.51	-1.54
Hmmr	8.03	7.41	-1.53
Thap2	7.92	7.31	-1.53
Tac1	7.76	7.15	-1.53
Plk4	5.91	5.29	-1.53
Gm4836; Gm10486	5.78	5.17	-1.53
Lsm5	5.71	5.1	-1.53
Pigw	5.67	5.06	-1.53
Gm5935	5.66	5.04	-1.53
Olfr485	5.21	4.6	-1.53
Gm14525	4.99	4.38	-1.53
Olfr513	4.79	4.18	-1.53
Gm9964	4.7	4.08	-1.53
Rbl1	8.9	8.3	-1.52
Prg4	8.79	8.18	-1.52
Kcnt1	8.13	7.52	-1.52
Bub1b	7.28	6.68	-1.52
Cyp4x1	6.72	6.12	-1.52
Gm38423; Gm11239; Gm11236; Gm11237	5.83	5.23	-1.52
Tcl1b5	5.7	5.1	-1.52
Olfr530	5.69	5.09	-1.52
Fcrla	5.65	5.05	-1.52
Zpbp	5.5	4.9	-1.52
4930539E08Rik	5.46	4.85	-1.52
Gm17267	5.19	4.59	-1.52
Mucl2; Mucl1	5.1	4.5	-1.52
Tex37	5.09	4.48	-1.52
Sorbs2	9.1	8.5	-1.51
Vcpkmt	7.45	6.86	-1.51
Gm10147; Gm10486	6.2	5.61	-1.51
Gm10487; Gm10486	6.2	5.61	-1.51
Olfr414	5.25	4.66	-1.51
Olfr1392	5.15	4.56	-1.51
Dnase1l3	4.96	4.36	-1.51
Tmbim7	4.6	4	-1.51
Olfr78; Olfr560	4.48	3.89	-1.51
Gm14409	8.46	7.87	-1.5
Dock10	8.4	7.81	-1.5
Cyb5d1	8.07	7.48	-1.5
Prg3	6.82	6.24	-1.5
Fam169a	6.81	6.23	-1.5
Tcf24	6.56	5.97	-1.5
Muc5b	6.54	5.96	-1.5
Tmem81	5.51	4.93	-1.5
Alms1-ps2	5.34	4.75	-1.5
Olfr525	4.96	4.38	-1.5
Slc3a1	4.64	4.05	-1.5
Gm4802	4.36	3.77	-1.5
Stfa1	4.09	3.5	-1.5
Olfr512	4.08	3.49	-1.5
Ms4a4c	8.19	7.61	-1.49
Il7r	8.15	7.57	-1.49
Cdk7	8.04	7.46	-1.49
Rdh1; Rdh9	7.44	6.86	-1.49
Egr4	7.2	6.63	-1.49
Spib	7.04	6.46	-1.49
Kcnc2	6.8	6.23	-1.49
Il2rb	6.78	6.21	-1.49
Hecw2	6.59	6.02	-1.49
Klra17	6.53	5.96	-1.49
Nanos1	6.21	5.63	-1.49
Gm10230; Gm10147; Gm14632; Gm10096; Gm10058; Gm10486; Gm14819; Gm2092; ENSMUSG00000073257	6.14	5.57	-1.49
Kif9	5.91	5.34	-1.49
Nek3	5.9	5.32	-1.49
Stox1	5.56	4.99	-1.49
Olfr478	5.39	4.82	-1.49
C2cd4c	5.32	4.75	-1.49
2410141K09Rik	5.09	4.52	-1.49
Gm21866	4.99	4.42	-1.49
Mptx2	4.72	4.15	-1.49
BC094916	4.63	4.05	-1.49
Cyp2a22	4.54	3.96	-1.49
Nlrp4d; RP23-469O12.4	4.36	3.79	-1.49
Bsph2	4.16	3.59	-1.49
Gm10801	12.31	11.75	-1.48
Ccl6	8.45	7.88	-1.48
Casc5	8.02	7.45	-1.48
Gk5	7.49	6.93	-1.48
Hr	7.1	6.54	-1.48
Slc25a33	6.81	6.24	-1.48
Itk	5.91	5.34	-1.48
Golga7b	5.73	5.17	-1.48
Serpina1e	5.62	5.06	-1.48
Mroh3	5.4	4.84	-1.48
Gm21936	4.66	4.09	-1.48
Serpine3	4.64	4.07	-1.48
Samd9l	9.26	8.71	-1.47
Rnase2a	8.51	7.95	-1.47
Galnt16	8.23	7.67	-1.47
Zfp51	8	7.44	-1.47
Tril	7.47	6.91	-1.47
Ggct	7.1	6.54	-1.47
Grm7	6.77	6.22	-1.47
Olfr398	6.57	6.01	-1.47
Gm2933	6.26	5.71	-1.47
Sox30	5.93	5.38	-1.47
Gm10553	5.83	5.27	-1.47
Trim42	5.74	5.19	-1.47
Ltb4r1	5.5	4.94	-1.47
Klra16	5.18	4.62	-1.47
Slc51a	4.93	4.37	-1.47
9330182O14Rik	4.72	4.16	-1.47
E2f8	9.49	8.94	-1.46
Slfn1	7.85	7.29	-1.46
Sgol1	7.74	7.19	-1.46
Pex11g	7.43	6.88	-1.46
Itln1	7.38	6.83	-1.46
Zfp212	7.15	6.61	-1.46
1700001O22Rik	7.04	6.5	-1.46
Baiap2	6.98	6.44	-1.46
Loxhd1	6.82	6.28	-1.46
Lim2; Gm38999	6.58	6.04	-1.46
Gimap3	6.28	5.73	-1.46
Pkd2l2	6.21	5.67	-1.46
Adamts3	5.64	5.09	-1.46
Klk1b5	5.58	5.04	-1.46
Wfdc8	4.85	4.3	-1.46
Olfr255	4.59	4.05	-1.46
Lce3b	4.55	4	-1.46
Olfr729	4.29	3.74	-1.46
Rwdd1	8.34	7.8	-1.45
Herc6	7.86	7.32	-1.45
Gba2	7.78	7.24	-1.45
Gm21188	7.29	6.76	-1.45
Lypd3	7.08	6.55	-1.45
Myh2	6.89	6.35	-1.45
Irf7	6.81	6.27	-1.45
5830473C10Rik	6.67	6.14	-1.45
Gm3706; Gm3750	6.57	6.04	-1.45
Zc3h12d	6.48	5.94	-1.45
Gm2863	6.38	5.85	-1.45
Mapk8	6.38	5.85	-1.45
Ifna7	6.29	5.75	-1.45
Gm8180	5.87	5.34	-1.45
D830013O20Rik	5.74	5.2	-1.45
Tex33	5.69	5.16	-1.45
EU599041	5.26	4.73	-1.45
Ankrd35	5.2	4.67	-1.45
Vmn2r1	5.15	4.62	-1.45
Mpp4	5.1	4.56	-1.45
Olfr1272	5.06	4.53	-1.45
Fam72a	4.65	4.11	-1.45
Gm21876	4.62	4.08	-1.45
C130073F10Rik	4.25	3.71	-1.45
Best2	4.24	3.7	-1.45
Gm17482	4.19	3.65	-1.45
Vmn2r44	4.17	3.63	-1.45
Ifi203	8.25	7.72	-1.44
Nuf2	8.03	7.5	-1.44
Kif2c	7.8	7.28	-1.44
Armc7	7.71	7.19	-1.44
Cenpf	7.68	7.15	-1.44
Faap20	7.61	7.08	-1.44
Trip13	7.05	6.52	-1.44
Cdca7	6.81	6.29	-1.44
Primpol	6.63	6.1	-1.44
Gm14632; Gm10058; Gm10486	6.15	5.63	-1.44
Kcng2	5.96	5.44	-1.44
Vmn2r57	5.72	5.19	-1.44
Pkdrej	5.72	5.19	-1.44
Olfr1331	5.59	5.07	-1.44
Msantd1	5.47	4.94	-1.44
Zfp640	5.43	4.91	-1.44
Asb17	4.87	4.34	-1.44
9130409I23Rik	4.67	4.14	-1.44
Gm7144	4.2	3.68	-1.44
Kbtbd12	4.2	3.68	-1.44
Myc	9.25	8.73	-1.43
Lepr	9.13	8.62	-1.43
Papd4	8.48	7.96	-1.43
S100a16	8.42	7.9	-1.43
Actn2	7.67	7.16	-1.43
Brca1	7.58	7.06	-1.43
Bard1	7.43	6.92	-1.43
Spic	7.12	6.61	-1.43
Gm14345	6.78	6.27	-1.43
Pdzk1	6.51	5.99	-1.43
BC117090	6.17	5.66	-1.43
Kctd18	6.1	5.59	-1.43
Tespa1	6.04	5.53	-1.43
Gm9327	6.01	5.5	-1.43
Fam83c	5.98	5.46	-1.43
Rab42	5.92	5.41	-1.43
Kctd12b	5.73	5.21	-1.43
Oprk1	5.54	5.02	-1.43
Pkib	5.52	5	-1.43
Iqcf5	5.43	4.91	-1.43
Prss2	5.37	4.86	-1.43
Vgll1	5.21	4.69	-1.43
Il4	4.74	4.23	-1.43
Tas2r105	4.49	3.97	-1.43
Art2a-ps	4.4	3.89	-1.43
Gm13769	4.14	3.63	-1.43
Olfr1506; Gm13769	4.14	3.63	-1.43
Gm5141	8.78	8.27	-1.42
Gypc	8.49	7.98	-1.42
Brca2	8.34	7.83	-1.42
Rngtt	8.13	7.62	-1.42
Tpx2	8.01	7.51	-1.42
Trhde	7.71	7.21	-1.42
Pygo2	7.65	7.14	-1.42
Tmem255a	7.55	7.05	-1.42
Ercc6l2	7.55	7.05	-1.42
AW146154	7.15	6.65	-1.42
Ptch2	7	6.5	-1.42
Ccdc58	6.87	6.36	-1.42
Cep55	6.72	6.22	-1.42
4922502D21Rik	6.46	5.96	-1.42
Gkn2	6.19	5.69	-1.42
4930503L19Rik	6.18	5.67	-1.42
Sox12	6.17	5.66	-1.42
Phldb3	6.17	5.67	-1.42
Gm19956	5.73	5.22	-1.42
Pnmt	5.63	5.12	-1.42
Tmem236	5.45	4.94	-1.42
Olfr598	5.34	4.84	-1.42
P2rx5	5.3	4.79	-1.42
Naa11	5.2	4.69	-1.42
Gm3213	5.12	4.62	-1.42
2010016I18Rik	5.09	4.58	-1.42
Pof1b	4.79	4.28	-1.42
Olfr138	4.75	4.25	-1.42
Cyp2j13	4.67	4.17	-1.42
Olfr1241	4.62	4.12	-1.42
Olfr381	4.34	3.83	-1.42
2210418O10Rik; Gm17258	10.29	9.8	-1.41
Gm14296	10.29	9.8	-1.41
Prune	9.62	9.12	-1.41
Slc25a27	8.54	8.05	-1.41
Kdm5a	8.48	7.98	-1.41
Mbtd1	8.28	7.78	-1.41
Otof	7.87	7.37	-1.41
Ankrd63	7.84	7.34	-1.41
Stil	7.71	7.21	-1.41
Loxl4	7.51	7.01	-1.41
Gm6713	7.24	6.75	-1.41
Ucn	7	6.51	-1.41
Trim30a	6.89	6.4	-1.41
Slc17a8	6.73	6.24	-1.41
Zdhhc19	6.65	6.16	-1.41
Sidt1	6.59	6.09	-1.41
Rdh14	6.49	5.99	-1.41
Gm10147; Gm10096; Gm10486; Gm10488	6.09	5.6	-1.41
Gm9328	6.08	5.58	-1.41
Gm4664	6.08	5.58	-1.41
Slc25a2	5.97	5.48	-1.41
Kbtbd8	5.61	5.11	-1.41
Gm7978; BC061212	5.54	5.05	-1.41
Tmem178	5.4	4.91	-1.41
Gm26657	5.29	4.79	-1.41
Fbxw10	5.23	4.73	-1.41
Il7	5.22	4.72	-1.41
Gm20826	4.96	4.46	-1.41
3830403N18Rik	4.75	4.25	-1.41
Il21r	4.74	4.24	-1.41
Ces2a	4.64	4.14	-1.41
Slc39a2	4.64	4.14	-1.41
Them5	4.56	4.06	-1.41
Pla2g12b	4.52	4.03	-1.41
Gm21762	4.24	3.75	-1.41
Gm10721	12.37	11.88	-1.4
Dmp1	11.12	10.63	-1.4
Sp100	10.18	9.7	-1.4
Tom1l1	8.71	8.22	-1.4
Pbk	8.56	8.08	-1.4
H2-DMb2	8.54	8.05	-1.4
Prim1	8.42	7.93	-1.4
Slc25a21	8.1	7.62	-1.4
Rhox6	7.63	7.15	-1.4
Ifitm7	7.55	7.07	-1.4
Zfp605	7.15	6.66	-1.4
Serpina6	7.12	6.64	-1.4
Cd200r2	7.08	6.6	-1.4
Lonrf3	6.93	6.44	-1.4
Grxcr1	6.56	6.08	-1.4
Tdrd1	6.29	5.8	-1.4
Pax8	6.08	5.6	-1.4
Gm5458	6.06	5.57	-1.4
Gm9945	5.99	5.5	-1.4
Tmem263	5.97	5.48	-1.4
Olfr399	5.82	5.33	-1.4
Fndc1	5.7	5.22	-1.4
Rb1	5.63	5.15	-1.4
Wnt8a	5.52	5.03	-1.4
Gm5728; Gm8660	5.49	5	-1.4
Gm5728; Gm8660	5.49	5	-1.4
Tas2r114	5.35	4.86	-1.4
Sbsn	5.19	4.71	-1.4
P2ry10	5.08	4.59	-1.4
Vsig4	5.02	4.53	-1.4
Krtap19-4	5.02	4.53	-1.4
Gm9881	4.94	4.46	-1.4
Gm5168	4.86	4.38	-1.4
Olfr140	4.78	4.3	-1.4
Stmnd1	4.76	4.27	-1.4
Gm5347; Adam34	4.59	4.11	-1.4
Rnase12	4.52	4.03	-1.4
Zscan4c	4.39	3.91	-1.4
Gm6121	4.39	3.9	-1.4
Bin3	8.46	7.98	-1.39
Gch1	7.78	7.31	-1.39
Map3k2	7.76	7.29	-1.39
Gm11034	7.68	7.21	-1.39
H2-Ob	7.67	7.2	-1.39
Rgs8	7.23	6.76	-1.39
Dnttip2	7.23	6.76	-1.39
Sh2d2a	6.92	6.44	-1.39
Slc2a4	6.87	6.39	-1.39
Cphx2	6.85	6.38	-1.39
Gm1968	6.82	6.35	-1.39
5730507C01Rik	6.65	6.18	-1.39
Gm6994	6.4	5.92	-1.39
Pkmyt1	6.38	5.9	-1.39
Tubgcp5	6.24	5.76	-1.39
2700081O15Rik	6.18	5.71	-1.39
Bco2	5.81	5.33	-1.39
Zfp28	5.77	5.29	-1.39
H60c	5.59	5.12	-1.39
Muc6	5.37	4.9	-1.39
Slc6a19os	4.84	4.37	-1.39
4921524L21Rik	4.81	4.33	-1.39
Arl5c	4.72	4.25	-1.39
Mrgpra9	4.49	4.02	-1.39
Nuggc	4.3	3.82	-1.39
Vmn2r3	4.22	3.75	-1.39
Gm766	4.2	3.72	-1.39
Hrnr	4.09	3.61	-1.39
Gm10717	12.48	12.02	-1.38
Gm17535	11.75	11.29	-1.38
Gapt	9.01	8.54	-1.38
Ints3	8.85	8.39	-1.38
Senp2	8.57	8.1	-1.38
Zfp111	8.53	8.06	-1.38
Dgkg	8.17	7.71	-1.38
Depdc1a	8.03	7.57	-1.38
Mndal	7.97	7.51	-1.38
F8	7.83	7.37	-1.38
Memo1	7.44	6.98	-1.38
Padi4	7.4	6.94	-1.38
Gm8138	7.15	6.69	-1.38
Gm8801	7.09	6.62	-1.38
Klra2	7.08	6.61	-1.38
Tmem213	6.88	6.42	-1.38
Bcl2l12	6.88	6.41	-1.38
Ccdc159	6.74	6.27	-1.38
Pink1; Mir7019	6.71	6.25	-1.38
Slamf6	6.48	6.02	-1.38
Eml2; Mir330	6.46	6	-1.38
Cd27; Mir8113	6.43	5.96	-1.38
Gm6234	5.81	5.35	-1.38
Gm4666	5.81	5.35	-1.38
Zfp820	5.7	5.24	-1.38
Kcnk18	5.7	5.24	-1.38
Ifit1bl1	5.61	5.14	-1.38
Atp4b	5.59	5.13	-1.38
Gm9990	5.53	5.07	-1.38
2310002L09Rik	5.5	5.04	-1.38
Hsf5	5.45	4.99	-1.38
Gm21961	5.45	4.99	-1.38
Gm13749	5.37	4.91	-1.38
Rimbp3	5.3	4.83	-1.38
Vmn1r238	4.88	4.42	-1.38
Vmn1r41; Vmn1r50	4.55	4.09	-1.38
Galntl6	4.39	3.92	-1.38
Hao2	4.35	3.88	-1.38
Olfr1383	4.15	3.69	-1.38
Olfr1284	4.01	3.54	-1.38
Gm10720	12.49	12.04	-1.37
Sf3a2	8.94	8.48	-1.37
Phgdh	8.09	7.63	-1.37
Usp14	7.75	7.3	-1.37
Pcbd2	7.64	7.19	-1.37
Themis2	7.48	7.02	-1.37
C1qtnf2	7.46	7.01	-1.37
Farsb	7.38	6.93	-1.37
2410131K14Rik	7.38	6.92	-1.37
Vps37c	7.2	6.75	-1.37
Dtwd1	6.99	6.54	-1.37
Gm933	6.95	6.5	-1.37
Unc13a	6.88	6.42	-1.37
Cryga	6.45	6	-1.37
Map6d1	6.44	5.98	-1.37
C130026L21Rik	6.38	5.93	-1.37
Fancb	6.32	5.87	-1.37
Gm13199	6.31	5.85	-1.37
Gm9920	6.08	5.62	-1.37
Npy2r	6.05	5.59	-1.37
Tmem101	6.03	5.57	-1.37
Olfr384	5.89	5.43	-1.37
Zfp808; BC052688	5.89	5.43	-1.37
Olfr467	5.87	5.42	-1.37
Usp29	5.8	5.35	-1.37
Psg22	5.6	5.14	-1.37
Gimap9	5.39	4.94	-1.37
Skap1	5.38	4.93	-1.37
Pmch	5.36	4.91	-1.37
Fancc	5.33	4.88	-1.37
Wdr64	5.17	4.71	-1.37
Olfr1299; Olfr1300-ps1; Olfr1295	5.07	4.62	-1.37
Reg3g	5.07	4.62	-1.37
Vwde	4.97	4.52	-1.37
Trpc5os	4.97	4.51	-1.37
Tnp1	4.96	4.51	-1.37
Gm15091	4.93	4.47	-1.37
LOC100862368	4.82	4.37	-1.37
Fkbp6	4.78	4.33	-1.37
Abca17	4.76	4.31	-1.37
4930407I10Rik	4.75	4.29	-1.37
Gm6760	4.56	4.1	-1.37
Olfr770	4.52	4.06	-1.37
Vmn2r60	4.37	3.92	-1.37
Gm17449	4.34	3.88	-1.37
Prl8a1	4.22	3.76	-1.37
5530401A14Rik	4.14	3.69	-1.37
Olfr338	4.05	3.59	-1.37
Olfr836	4.03	3.58	-1.37
Jchain	10.21	9.76	-1.36
Fhdc1	10.12	9.68	-1.36
Mthfd2	8.85	8.4	-1.36
Arhgap15	8.64	8.2	-1.36
Abcb4	8.57	8.13	-1.36
Gm13238	8.31	7.87	-1.36
Ifi44	8.15	7.7	-1.36
Zfp410	8.1	7.66	-1.36
Cox11	8.09	7.64	-1.36
Mdn1	8.07	7.62	-1.36
Dolpp1	7.92	7.47	-1.36
Fxyd7	7.8	7.35	-1.36
Gpr88	7.72	7.27	-1.36
Dmd	7.71	7.26	-1.36
Snapc1	7.52	7.08	-1.36
Ccdc84	7.5	7.06	-1.36
Mblac2	7.32	6.87	-1.36
2900055J20Rik	7.28	6.83	-1.36
Kng1	7.26	6.83	-1.36
Arfgef3	6.99	6.54	-1.36
P2ry14; F630111L10Rik	6.96	6.52	-1.36
Amigo2	6.92	6.47	-1.36
Anp32e	6.84	6.39	-1.36
Lrrc42	6.79	6.34	-1.36
Zfp42	6.68	6.23	-1.36
Tmem45a2	6.58	6.14	-1.36
Ccl2	6.53	6.08	-1.36
Fam217b	6.33	5.88	-1.36
Bmx	6.22	5.78	-1.36
Larp1b	6.12	5.68	-1.36
Gm14632; Gm10486	6.08	5.64	-1.36
Bpifb5	5.8	5.35	-1.36
Izumo3	5.78	5.33	-1.36
Gpr160	5.7	5.25	-1.36
Gm1604b	5.62	5.17	-1.36
Defb45	5.61	5.17	-1.36
Gm10046	5.5	5.06	-1.36
Trappc3l	5.5	5.05	-1.36
Tspan18	5.39	4.94	-1.36
Lamp3	5.25	4.8	-1.36
Serpinb8	5.2	4.75	-1.36
Grik1	5.02	4.58	-1.36
Trim40	4.99	4.55	-1.36
Ifng	4.91	4.46	-1.36
Vmn1r169	4.89	4.45	-1.36
Olfr507	4.45	4	-1.36
Vmn2r62	4.44	4	-1.36
Spo11	4.3	3.85	-1.36
Mrgprd	4.11	3.66	-1.36
Svil	10.68	10.24	-1.35
Plk1	9.29	8.85	-1.35
Myh10	9	8.56	-1.35
Rfc4	8.98	8.55	-1.35
Rab44	8.89	8.45	-1.35
Dck	8.55	8.12	-1.35
D930015E06Rik	8.5	8.06	-1.35
Mllt3	8.41	7.98	-1.35
Cmtr2	8.4	7.96	-1.35
Bcl11a	8.23	7.8	-1.35
Kif15	8.19	7.75	-1.35
Ankrd49	8.13	7.7	-1.35
Med8	7.91	7.47	-1.35
Krtap16-3	7.88	7.45	-1.35
Wdr20	7.82	7.39	-1.35
Syne2; Mir5101	7.8	7.37	-1.35
Cdca5	7.78	7.35	-1.35
Arhgap11a	7.7	7.26	-1.35
Coa6	7.64	7.21	-1.35
Parvg	7.64	7.21	-1.35
Brwd1	7.29	6.86	-1.35
Trim63	7.2	6.77	-1.35
D730001G18Rik	7	6.57	-1.35
Btnl10	6.9	6.47	-1.35
Ms4a6b	6.63	6.2	-1.35
Casq2	6.57	6.13	-1.35
Dleu7	6.56	6.13	-1.35
B230206H07Rik	6.49	6.06	-1.35
Fkrp	6.33	5.89	-1.35
Ankrd34c	6.17	5.74	-1.35
Slamf7	6.01	5.58	-1.35
Wfdc5	5.88	5.45	-1.35
D830025C05Rik	5.52	5.08	-1.35
Vwa1	5.43	5	-1.35
Lacc1	5.03	4.6	-1.35
Amelx	5.01	4.59	-1.35
Spin2g	4.88	4.45	-1.35
Vmn1r52	4.79	4.35	-1.35
Kynu	4.76	4.33	-1.35
4930512B01Rik	4.76	4.32	-1.35
Olfr1330	4.56	4.13	-1.35
Olfr734	4.22	3.79	-1.35
Gm10715	12.37	11.95	-1.34
Neil3	8.91	8.49	-1.34
Heca	8.51	8.09	-1.34
Ticrr	8.36	7.94	-1.34
Zfp882	8.35	7.92	-1.34
Katnal1; 5930430L01Rik	8.3	7.88	-1.34
Phf24	8.22	7.79	-1.34
Zfp120	8.19	7.77	-1.34
Neu1	8.08	7.66	-1.34
Actc1	7.86	7.44	-1.34
Ier5	7.8	7.37	-1.34
Hapln1	7.72	7.29	-1.34
Ahctf1	7.7	7.28	-1.34
Btn1a1	7.68	7.26	-1.34
Dnal1	7.64	7.22	-1.34
Abca8a	7.55	7.13	-1.34
Ndnl2	7.53	7.11	-1.34
Krt12	7.34	6.92	-1.34
Gm5483	7.34	6.92	-1.34
Jakmip2	7.28	6.86	-1.34
Gm12185; Tgtp1	7.17	6.75	-1.34
Ebi3	7.16	6.73	-1.34
Igll1	7.15	6.73	-1.34
Dnajc16	6.71	6.29	-1.34
Hcar2	6.69	6.27	-1.34
Apol6	6.66	6.24	-1.34
Gm14151	6.45	6.02	-1.34
Zcchc10	6.43	6	-1.34
Crb2	6.21	5.8	-1.34
Cep290	6.19	5.77	-1.34
Gm10230; Gm10486	6.14	5.72	-1.34
Gm10638	6.03	5.61	-1.34
Gm5464	5.91	5.49	-1.34
Ccdc112	5.76	5.34	-1.34
Gm10488; Gm10487; Gm10096; Gm10486	5.64	5.21	-1.34
Apol7e	5.56	5.14	-1.34
Gm21891	5.51	5.08	-1.34
Gm21828	5.51	5.08	-1.34
Gm21725	5.51	5.08	-1.34
Gm21904	5.51	5.08	-1.34
Gm21764	5.51	5.08	-1.34
Gm21852	5.51	5.08	-1.34
Olfr63	5.33	4.91	-1.34
1700102P08Rik	5.31	4.88	-1.34
Gm4836; Gm10486	5.29	4.87	-1.34
Olfr1417	5.28	4.85	-1.34
Olfr370	5.2	4.77	-1.34
Myo7b	5.04	4.62	-1.34
Taar2	4.65	4.23	-1.34
Qrfpr	4.63	4.21	-1.34
Prl8a9	4.47	4.05	-1.34
1700129C05Rik	4.45	4.03	-1.34
Gdpd4	4.43	4	-1.34
Bhlhe23	4.18	3.76	-1.34
Olfr765	4.12	3.7	-1.34
Hscb	4.02	3.59	-1.34
Ranbp2	9.96	9.55	-1.33
9030624G23Rik	8.69	8.28	-1.33
Il2rg	8.5	8.09	-1.33
Mfsd8	8.08	7.67	-1.33
Ipo8	7.89	7.48	-1.33
Rcl1	7.81	7.4	-1.33
Papd7	7.74	7.32	-1.33
Ddb2	7.48	7.06	-1.33
Slc22a3	7.39	6.98	-1.33
Gpr25	7.37	6.96	-1.33
Tead1	7.33	6.92	-1.33
Fancm	7.31	6.9	-1.33
Timeless	7.22	6.81	-1.33
Cwc25	7.17	6.76	-1.33
Cd8a	7.12	6.71	-1.33
Fxyd4	6.91	6.5	-1.33
3110040M04Rik	6.76	6.35	-1.33
Cd22	6.71	6.3	-1.33
Cryzl1	6.61	6.2	-1.33
BC025920	6.35	5.93	-1.33
Sstr4	6.32	5.91	-1.33
Elfn1	6.08	5.67	-1.33
Cct8l1	6.03	5.62	-1.33
Hand1	6.01	5.6	-1.33
Trim43a	5.94	5.54	-1.33
Tph2	5.92	5.52	-1.33
Patl2	5.9	5.49	-1.33
Pom121l12	5.79	5.38	-1.33
Cxcl1	5.63	5.22	-1.33
Mogat1	5.55	5.14	-1.33
Scgb2b7	5.5	5.09	-1.33
Lhx9	5.12	4.71	-1.33
Spink8	5.03	4.61	-1.33
1700039E15Rik	4.83	4.42	-1.33
Hoxc6	4.81	4.4	-1.33
Tprg	4.8	4.39	-1.33
Cldn16	4.73	4.33	-1.33
Ms4a4b	4.71	4.31	-1.33
Olfr1445	4.59	4.18	-1.33
Olfr722	4.27	3.86	-1.33
Gm5544	4.18	3.76	-1.33
4933417A18Rik	4.11	3.7	-1.33
Akt3	9.91	9.5	-1.32
Tfg	9.82	9.41	-1.32
Erc1	9.63	9.23	-1.32
Jmjd1c	9.6	9.2	-1.32
Itgb7	9.4	9	-1.32
Api5	9.24	8.84	-1.32
Azi2	9.16	8.76	-1.32
Mapre3	9.15	8.75	-1.32
Ak2	8.98	8.57	-1.32
Cdkn3	8.85	8.44	-1.32
Xdh	8.35	7.95	-1.32
Gm7609	8.13	7.73	-1.32
Rbm45	8.12	7.71	-1.32
Tub; BC049265	8.09	7.69	-1.32
Ddit3	8.08	7.68	-1.32
Fam151b	7.85	7.45	-1.32
Tmem194; 1700012D01Rik	7.79	7.39	-1.32
Gm14151; Gm14147	7.75	7.35	-1.32
Grxcr2	7.71	7.31	-1.32
Gm19399	7.6	7.19	-1.32
Flt4	7.48	7.07	-1.32
Calcr	7.46	7.06	-1.32
Grik2	7.32	6.92	-1.32
Ushbp1	7.15	6.75	-1.32
Rita1	7.1	6.7	-1.32
Strip2	7.04	6.64	-1.32
Gm2825	6.95	6.55	-1.32
Top2b	6.83	6.42	-1.32
Unkl	6.78	6.37	-1.32
Gucy2f	6.68	6.29	-1.32
Noxred1	6.59	6.19	-1.32
Gap43	6.51	6.11	-1.32
Chrna7	6.37	5.97	-1.32
Astn1	6.26	5.87	-1.32
Mastl	6.08	5.68	-1.32
Ghrl	6.01	5.6	-1.32
Cenpl	6	5.6	-1.32
Tigd3	5.99	5.59	-1.32
Slc35d3	5.96	5.55	-1.32
Rasd2	5.8	5.39	-1.32
Gm9745	5.62	5.21	-1.32
Adcy8	5.5	5.1	-1.32
Zfp57	5.43	5.03	-1.32
Klra4; Klra15; Klra1; Klra22; Klra18	5.4	5	-1.32
Sp8	5.33	4.93	-1.32
Gm2244	4.93	4.54	-1.32
Spatc1	4.86	4.46	-1.32
Olfr1356	4.77	4.37	-1.32
Gm10549	4.75	4.36	-1.32
Gif	4.75	4.35	-1.32
Gm7244	4.7	4.3	-1.32
Map3k6	4.66	4.27	-1.32
Olfr1370	4.62	4.22	-1.32
Zfp872	4.55	4.15	-1.32
Gm10192	4.46	4.07	-1.32
Il2ra	4.44	4.03	-1.32
Olfr1138	4.35	3.94	-1.32
Kbtbd13	4.28	3.88	-1.32
Vmn2r12	4.26	3.86	-1.32
Gm7247	4.11	3.71	-1.32
Krtap19-9a	4.04	3.63	-1.32
2410137M14Rik	4.03	3.63	-1.32
Olfr1014	4	3.6	-1.32
Hist2h2aa1	13.34	12.95	-1.31
Hist2h2aa2	13.34	12.95	-1.31
Samhd1	10.74	10.36	-1.31
4930522L14Rik	10.1	9.71	-1.31
Ankrd11	9.28	8.9	-1.31
F5	8.98	8.59	-1.31
Med13	8.75	8.36	-1.31
Nbr1	8.66	8.27	-1.31
Tysnd1	8.42	8.03	-1.31
Cd55	8.39	8	-1.31
Me2	8.31	7.92	-1.31
Gpr137c	8.3	7.91	-1.31
Gm11084	8.15	7.76	-1.31
Ccnf; Mir5134	8.14	7.75	-1.31
H2-T24	8.14	7.75	-1.31
Gm5512	8.07	7.67	-1.31
Smc6	7.86	7.47	-1.31
Fcer2a	7.63	7.24	-1.31
Cep95	7.59	7.2	-1.31
5430403G16Rik	7.58	7.19	-1.31
Pilrb2	7.55	7.16	-1.31
Kcnd3	7.48	7.08	-1.31
Rusc2	7.48	7.09	-1.31
Gm6625	7.47	7.08	-1.31
Gm8024	7.36	6.97	-1.31
Nedd1	7.32	6.93	-1.31
Zw10	7.31	6.92	-1.31
H2-T22; H2-T9	7.21	6.82	-1.31
Pold4	7.2	6.81	-1.31
Celf4	6.98	6.59	-1.31
Gpr161	6.97	6.58	-1.31
Cd101	6.91	6.52	-1.31
Smarcc1	6.89	6.5	-1.31
D030056L22Rik	6.89	6.5	-1.31
Rorc	6.73	6.34	-1.31
Gm9970	6.66	6.27	-1.31
Tmem28	6.6	6.21	-1.31
Cd8b1	6.54	6.15	-1.31
Gabre	6.54	6.15	-1.31
Tbc1d32	6.54	6.14	-1.31
Capn11	6.48	6.09	-1.31
Siah1a	6.44	6.05	-1.31
2010005H15Rik	6.15	5.76	-1.31
Cdk3-ps	6.12	5.73	-1.31
Homez	6.11	5.72	-1.31
BC035044	6.1	5.71	-1.31
Twist2	6.06	5.67	-1.31
Mocs3	6.06	5.67	-1.31
Zfp354a	5.81	5.42	-1.31
Itgae	5.67	5.29	-1.31
Vpreb1	5.61	5.22	-1.31
Adam21	5.56	5.17	-1.31
Gm21750	5.53	5.13	-1.31
Erich6	5.48	5.09	-1.31
Mok	5.48	5.09	-1.31
Cym	5.46	5.07	-1.31
Gpr142	5.39	5.01	-1.31
Cdsn	5.28	4.89	-1.31
Olfr1413	5.26	4.87	-1.31
Gm29142	5.23	4.84	-1.31
Gm4778	5.09	4.7	-1.31
Itpka	5.08	4.69	-1.31
Ostn	5.04	4.65	-1.31
Gm3043; Gm10408	5.01	4.62	-1.31
Olfr435	4.96	4.57	-1.31
4930486L24Rik	4.83	4.44	-1.31
4921517D22Rik	4.8	4.4	-1.31
Vsig1	4.78	4.39	-1.31
Cyp2j12	4.74	4.35	-1.31
Samd15	4.61	4.22	-1.31
Rs1	4.6	4.22	-1.31
Klra23; Klra13-ps	4.34	3.95	-1.31
Olfr126	4.34	3.95	-1.31
Gm2012	4.28	3.89	-1.31
Olfr675	4.19	3.8	-1.31
Olfr972	4.19	3.8	-1.31
Gm136	4.18	3.79	-1.31
Olfr853	4.17	3.78	-1.31
Sel1l2	4.16	3.77	-1.31
Olfr624	4.1	3.72	-1.31
Prl2c2	4.04	3.65	-1.31
Csf3r	10.62	10.24	-1.3
Wrb	9.8	9.42	-1.3
Cep85	9.3	8.92	-1.3
Glipr1	9.17	8.79	-1.3
Ccr2	9.01	8.63	-1.3
Safb2	8.99	8.62	-1.3
Zfp397	8.94	8.56	-1.3
Klf1	8.36	7.98	-1.3
Slc35c2	8.22	7.83	-1.3
Thoc2	8	7.62	-1.3
Btk	7.89	7.51	-1.3
Mthfd2l	7.82	7.44	-1.3
Nphp3	7.79	7.41	-1.3
Nek2	7.73	7.35	-1.3
Defb35	7.63	7.25	-1.3
Hspa1b; Hspa1a	7.44	7.06	-1.3
Cntrob	7.27	6.89	-1.3
Mb	7.27	6.89	-1.3
Ctc1	7.23	6.85	-1.3
[truncated: 52 more rows]

## Sheet: Table S2
Table S2: KEGG pathways A) downregulated and B) upregulated in the Fus1 KO mouse cochlea
Note: cut off parameters for creating these gene sets were fold change x1.3 and expression level intensity -4 (Log2 value).
For KEGG analysis, only annotated genes were used.
A) Pathways downregulated in the Fus1 KO cochlea
Genes	NGR	TNGR	NG	TNG	Hyp	Hyp*	Annotations		Biological process
16 genes	82	37681	16	828	2.77016e-11	4.45995e-09	(KEGG) 04640: Hematopoietic cell lineage		Immune system and associated diseases
10 genes	34	37681	10	828	2.02369e-09	1.62907e-07	(KEGG) 05340: Primary immunodeficiency		Immune system and associated diseases
23 genes	244	37681	23	828	6.05886e-09	3.25159e-07	(KEGG) 04060: Cytokine-cytokine receptor interaction		Immune system and associated diseases
49 genes	980	37681	49	828	1.12027e-07	4.50908e-06	(KEGG) 04740: Olfactory transduction		Signal transduction
15 genes	153	37681	15	828	1.58745e-06	5.1116e-05	(KEGG) 04630: Jak-STAT signaling pathway		Signal transduction
9 genes	76	37681	9	828	4.37571e-05	0.00117415	(KEGG) 04610: Complement and coagulation cascades		Immune system and associated diseases
10 genes	108	37681	10	828	0.000138668	0.00279069	(KEGG) 04660: T cell receptor signaling pathway		Immune system and associated diseases
5 genes	23	37681	5	828	0.000122574	0.0028192	(KEGG) 05310: Asthma		Immune system and associated diseases
11 genes	135	37681	11	828	0.000204692	0.00366171	(KEGG) 05162: Measles		Immune system and associated diseases
8 genes	75	37681	8	828	0.000242144	0.00389851	(KEGG) 04662: B cell receptor signaling pathway		Immune system and associated diseases
11 genes	143	37681	11	828	0.000337361	0.00493774	(KEGG) 04514: Cell adhesion molecules (CAMs)		Cell adhesion
7 genes	63	37681	7	828	0.000458386	0.00567694	(KEGG) 05320: Autoimmune thyroid disease		Immune system and associated diseases
16 genes	276	37681	16	828	0.00045131	0.00605507	(KEGG) 04080: Neuroactive ligand-receptor interaction		Neural response
6 genes	48	37681	6	828	0.000618146	0.00663476	(KEGG) 05330: Allograft rejection		Immune system and associated diseases
12 genes	177	37681	12	828	0.000582408	0.00669769	(KEGG) 04062: Chemokine signaling pathway		Immune system and associated diseases
8 genes	92	37681	8	828	0.000964575	0.00970604	(KEGG) 05322: Systemic lupus erythematosus		Immune system and associated diseases
5 genes	43	37681	5	828	0.00244159	0.0218387	(KEGG) 04672: Intestinal immune network for IgA production		Immune system and associated diseases
7 genes	83	37681	7	828	0.00235984	0.0223491	(KEGG) 05416: Viral myocarditis		Immune system and associated diseases
4 genes	29	37681	4	828	0.00355067	0.0300873	(KEGG) 05216: Thyroid cancer		Cancer
5 genes	50	37681	5	828	0.00473946	0.0381527	(KEGG) 05332: Graft-versus-host disease		Immune system and associated diseases
10 genes	173	37681	10	828	0.00513068	0.0393352	(KEGG) 05152: Tuberculosis		Immune system and associated diseases
8 genes	123	37681	8	828	0.00591911	0.0414338	(KEGG) 04110: Cell cycle		Cell cycle
6 genes	74	37681	6	828	0.00577644	0.042273	(KEGG) 04612: Antigen processing and presentation		Immune system and associated diseases
5 genes	55	37681	5	828	0.00711592	0.0477359	(KEGG) 04940: Type I diabetes mellitus		Metabolism
B) Pathways upregulated in the Fus1 KO cochlea
Genes	NGR	TNGR	NG	TNG	Hyp	Hyp*	Annotations		Biological process
30 genes	276	37681	30	915	9.79191e-12	1.71358e-09	(KEGG) 04080: Neuroactive ligand-receptor interaction		Neural response
11 genes	79	37681	11	915	3.27374e-06	0.000143226	(KEGG) 03320: PPAR signaling pathway		Metabolism
11 genes	79	37681	11	915	3.27374e-06	0.000143226	(KEGG) 00590: Arachidonic acid metabolism		Metabolism
9 genes	50	37681	9	915	2.89639e-06	0.000253434	(KEGG) 04930: Type II diabetes mellitus		Metabolism
7 genes	44	37681	7	915	8.51838e-05	0.00298143	(KEGG) 04975: Fat digestion and absorption		Metabolism
17 genes	244	37681	17	915	0.00011063	0.00322672	(KEGG) 04060: Cytokine-cytokine receptor interaction		Immune system and associated diseases
6 genes	51	37681	6	915	0.00143202	0.0358006	(KEGG) 00561: Glycerolipid metabolism		Metabolism
5 genes	38	37681	5	915	0.00215715	0.0377501	(KEGG) 00051: Fructose and mannose metabolism		Metabolism
10 genes	135	37681	10	915	0.0017492	0.0382638	(KEGG) 04910: Insulin signaling pathway		Metabolism
6 genes	55	37681	6	915	0.00212409	0.0413018	(KEGG) 05217: Basal cell carcinoma		Cancer
7 genes	78	37681	7	915	0.00288522	0.0459012	(KEGG) 04146: Peroxisome		Metabolism
4 genes	26	37681	4	915	0.00337331	0.0491942	(KEGG) 04950: Maturity onset diabetes of the young		Metabolism
NGR = Number of annotated genes in the reference list;
TNGR = Total number of genes in the reference list;
NG = Number of annotated genes in the input list;
TNG = Total number of genes in the input list;
Hyp = Hypergeometric pValue; Hyp* = Corrected hypergeometric pValue

## Sheet: Table S3
Table S3: Upregulated and downregulated genes from the A) “Neuroactive ligand-receptor interaction” KEGG pathway and B) “Cytokine-cytokine receptor interaction” KEGG pathway in the Fus1 KO mouse cochlea
Gene expression is expressed as a fold change relative to WT levels.
A) List of upregulated and downregulated genes from the "Neuroactive ligand-receptor interaction" KEGG pathway in the Fus1 KO cochlea
Upregulated in the Fus1 KO cochlea (n=30), corrected hypergeometric p value = 0.00000000171358
Gene Symbol	Description	Intensity	Intensity	Fold change
		WT (log)	KO (log)	KO/WT (linear)
C3ar1	complement component 3a receptor 1	7.04	7.63	1.51
Gabrp	gamma-aminobutyric acid (GABA) A receptor, pi	5.3	6.24	1.92
Npbwr1	neuropeptides B/W receptor 1	4.89	5.28	1.31
Grin3a	glutamate receptor ionotropic, NMDA3A	5.15	5.97	1.77
Lpar3	lysophosphatidic acid receptor 3	6.9	7.3	1.32
Adrb3	adrenergic receptor, beta 3	4.67	5.2	1.45
Taar6	trace amine-associated receptor 6	5.51	5.89	1.3
Chrnb1	cholinergic receptor, nicotinic, beta polypeptide 1 (muscle)	6.58	7.52	1.92
Gpr83	G protein-coupled receptor 83	5.12	5.94	1.76
Mc2r	melanocortin 2 receptor	5.05	5.57	1.43
Vipr1	vasoactive intestinal peptide receptor 1	4.78	5.47	1.61
Lep	leptin	4.35	4.82	1.39
Htr2a	5-hydroxytryptamine (serotonin) receptor 2A	6.47	6.87	1.32
Taar7e	trace amine-associated receptor 7E	6.13	6.54	1.32
Cga	glycoprotein hormones, alpha subunit	5.29	6.81	2.87
Adcyap1r1	adenylate cyclase activating polypeptide 1 receptor 1	6.74	7.28	1.45
Taar4	trace amine-associated receptor 4	4.44	4.86	1.34
Prl	prolactin	10.74	12.1	2.56
Hrh3	histamine receptor H3	5.88	6.33	1.37
Gh	growth hormone	10.35	11.88	2.89
Ntsr1	neurotensin receptor 1	4.86	5.43	1.49
Ptgfr	prostaglandin F receptor	6.83	7.28	1.37
S1pr1	sphingosine-1-phosphate receptor 1	7.99	8.44	1.37
Sstr2	somatostatin receptor 2	4.94	5.36	1.34
Uts2r	urotensin 2 receptor	4.51	5.23	1.65
Gabra2	gamma-aminobutyric acid (GABA) A receptor, subunit alpha 2	7.34	8.01	1.6
Drd3	dopamine receptor D3	5.24	5.81	1.48
Lhb	luteinizing hormone beta	6.5	6.98	1.4
Ntsr2	neurotensin receptor 2	7.37	7.84	1.38
Oprd1	opioid receptor, delta 1	6.65	7.22	1.49
Downregulated in the Fus1 KO cochlea (n=15), corrected hypergeometric p value = 0.00605507
Gene Symbol	Description	Intensity	Intensity	Fold change
		WT (log)	KO (log)	KO/WT (linear)
Sstr4	somatostatin receptor 4	6.32	5.91	-1.33
Oprm1	opioid receptor, mu 1	6.3	5.45	-1.81
Ltb4r1	leukotriene B4 Receptor	5.5	4.94	-1.47
Grm7	glutamate receptor, metabotropic 7 [Source:HGNC Symbol;Acc:4599]	6.77	6.22	-1.47
Calcr	calcitonin receptor [Source:HGNC Symbol;Acc:1440]	7.46	7.06	-1.32
P2ry10	purinergic receptor P2Y, G-protein coupled, 10 [Source:HGNC Symbol;Acc:19906]	5.08	4.59	-1.4
Lepr	leptin receptor [Source:HGNC Symbol;Acc:6554]	9.13	8.62	-1.43
Grik1	glutamate receptor, ionotropic, kainate 1 [Source:HGNC Symbol;Acc:4579]	5.02	4.58	-1.36
Gabre	gamma-aminobutyric acid (GABA) A receptor, epsilon [Source:HGNC Symbol;Acc:4085]	6.54	6.15	-1.31
P2rx5	purinergic receptor P2X, ligand-gated ion channel, 5 [Source:HGNC Symbol;Acc:8536]	5.3	4.79	-1.42
Npy2r	neuropeptide Y receptor Y2 [Source:HGNC Symbol;Acc:7957]	6.05	5.59	-1.37
Grik2	glutamate receptor, ionotropic, kainate 2 [Source:HGNC Symbol;Acc:4580]	7.32	6.92	-1.32
Oprk1	opioid receptor, kappa 1 [Source:HGNC Symbol;Acc:8154]	5.54	5.02	-1.43
Taar2	trace amine associated receptor 2 [Source:HGNC Symbol;Acc:4514]	4.65	4.23	-1.34
Chrna7	cholinergic receptor, nicotinic, alpha 7 [Source:HGNC Symbol;Acc:1960]	6.37	5.97	-1.32
B) List of upregulated and downregulated genes from the "Cytokine-cytokine receptor interaction" KEGG pathway in the Fus1 KO cochlea
Upregulated in the Fus1 KO cochlea (n=17), corrected hypergeometric p value = 0.00322672
Tnfrsf8	tumor necrosis factor receptor superfamily, member 8 [Source:MGI Symbol;Acc:MGI:99908]	5.7	6.08	1.3
Inhbe	inhibin beta E [Source:MGI Symbol;Acc:MGI:109269]	5.54	5.95	1.33
Bmp2	bone morphogenetic protein 2 [Source:MGI Symbol;Acc:MGI:88177]	6.29	6.8	1.42
Il22ra2	interleukin 22 receptor, alpha 2 [Source:MGI Symbol;Acc:MGI:2665114]	4.55	5	1.37
Egf	epidermal growth factor [Source:MGI Symbol;Acc:MGI:95290]	6.21	6.68	1.39
Ccr10	chemokine (C-C motif) receptor 10 [Source:MGI Symbol;Acc:MGI:1096320]	5.06	5.67	1.53
Xcr1	chemokine (C motif) receptor 1 [Source:MGI Symbol;Acc:MGI:1346338]	4.77	5.19	1.34
Lep	leptin [Source:MGI Symbol;Acc:MGI:104663]	4.35	4.82	1.39
Il23r	interleukin 23 receptor [Source:MGI Symbol;Acc:MGI:2181693]	4.13	4.56	1.35
Prl	prolactin [Source:MGI Symbol;Acc:MGI:97762]	10.74	12.1	2.56
Tnfrsf17	tumor necrosis factor receptor superfamily, member 17 [Source:MGI Symbol;Acc:MGI:1343050]	4.96	5.33	1.3
Ccl8	chemokine (C-C motif) ligand 8 [Source:MGI Symbol;Acc:MGI:101878]	4.07	4.66	1.5
Gdf5	growth differentiation factor 5 [Source:MGI Symbol;Acc:MGI:95688]	5.6	6.06	1.38
Lif	leukemia inhibitory factor [Source:MGI Symbol;Acc:MGI:96787]	6.3	6.7	1.32
Tnfrsf12a	tumor necrosis factor receptor superfamily, member 12a [Source:MGI Symbol;Acc:MGI:1351484]	8.1	8.57	1.38
Ccl12	chemokine (C-C motif) ligand 12 [Source:MGI Symbol;Acc:MGI:108224]	4.61	5.15	1.46
Il25	interleukin 25 [Source:MGI Symbol;Acc:MGI:2155888]	5.17	5.83	1.58
Downregulated in the Fus1 KO cochlea (n=23), corrected hypergeometric p value = 3.25E-07
Ccr9	chemokine (C-C motif) receptor 9 [Source:HGNC Symbol;Acc:1610]	5.45	4.55	-1.87
Ccr1l1	chemokine (C-C motif) receptor 1-like 1	4.68	3.99	-1.61
Ifng	interferon, gamma [Source:HGNC Symbol;Acc:5438]	4.91	4.46	-1.36
Ccr2	chemokine (C-C motif) receptor 2 [Source:HGNC Symbol;Acc:1603]	9.01	8.63	-1.3
Il7	interleukin 7 [Source:HGNC Symbol;Acc:6023]	5.22	4.72	-1.41
Il2rb	interleukin 2 receptor, beta [Source:HGNC Symbol;Acc:6009]	6.78	6.21	-1.49
Ccr6	chemokine (C-C motif) receptor 6 [Source:HGNC Symbol;Acc:1607]	5.83	5.17	-1.58
Il2ra	interleukin 2 receptor, alpha [Source:HGNC Symbol;Acc:6008]	4.44	4.03	-1.32
Cxcl1	chemokine (C-X-C motif) ligand 1 (melanoma growth stimulating activity, alpha) [Source:HGNC Symbol;Acc:4602]	5.63	5.22	-1.33
Flt4	fms-related tyrosine kinase 4 [Source:HGNC Symbol;Acc:3767]	7.48	7.07	-1.32
Tnfsf4	tumor necrosis factor (ligand) superfamily, member 4 [Source:HGNC Symbol;Acc:11934]	4.7	3.87	-1.78
Lepr	leptin receptor [Source:HGNC Symbol;Acc:6554]	9.13	8.62	-1.43
Ccl6	chemokine (C-C motif) ligand 6	8.45	7.88	-1.48
Il4	interleukin 4 [Source:HGNC Symbol;Acc:6014]	4.74	4.23	-1.43
Il5ra	interleukin 5 receptor, alpha [Source:HGNC Symbol;Acc:6017]	5.92	5.01	-1.89
Il7r	interleukin 7 receptor [Source:HGNC Symbol;Acc:6024]	8.15	7.57	-1.49
Il21r	interleukin 21 receptor [Source:HGNC Symbol;Acc:6006]	4.74	4.24	-1.41
Ifna14	interferon, alpha 14 [Source:HGNC Symbol;Acc:5420]	5.89	5.2	-1.61
Csf3r	colony stimulating factor 3 receptor (granulocyte) [Source:HGNC Symbol;Acc:2439]	10.62	10.24	-1.3

## Sheet: Table S4
Table S4: Altered expression of HPA hormones and their cognate receptors in the Fus1 KO mouse cochlea
Functional analysis of the top 100 upregulated and downregulated genes in the Fus1 KO cochlea revealed significantly altered expression of key HPA axis hormones.
In contrast, cognate receptors of HPA axis hormones remained unaltered. Gene expression is expressed as a fold change relative to WT levels.
	HPA hormones
Gene Symbol	Gene name	Intensity	Intensity	Fold change
		WT (log)	KO (log)	KO/WT (linear)
Pomc	pro-opiomelanocortin-alpha	7.92	7.03	-1.85
Tac2	tachykinin 2	6.51	5.52	-1.99
Calca	calcitonin/calcitonin-related polypeptide, alpha	6.45	5.61	-1.8
Spx	spexin hormone	5.16	4.5	-1.57
Gh	growth hormone	10.35	11.88	2.89
Cga	glycoprotein hormones, alpha subunit	5.29	6.81	2.87
Prl	prolactin	10.74	12.1	2.56
	HPA hormone cognate receptors and related molecules
Gene Symbol	Gene name (hormone symbol of corresp. receptor)	Intensity	Intensity	Fold change
		WT (log)	KO (log)	KO/WT (linear)
Ghr	growth hormone receptor (Gh)	4.41	4.33	1.18
Prlr	prolactin receptor (Prl)	5.14	5.2	-1.06
Tacr2	tachykinin receptor 2 (Tac2)	7.73	7.64	1.04
Calcrl	calcitonin receptor-like (Calca)	5.88	5.96	-1.06
Galr2	galanin receptor 2 (spexin)	6.3	5.45	1.06
Oprm1	opioid receptor, mu 1 - β-and alpha Endorphin receptor (POMC)	5.02	5.27	-1.81
Mc4r	melanocortin 4 receptor - beta- and alpha-MSH receptor (POMC )	5.05	5.57	1.19
Mc2r	melanocortin 2 receptor - ACTH receptor (POMC)	5.57	5.46	1.43
Mc1r	melanocortin 1 receptor (POMC)	5.04	5.29	-1.08
Mc3r	melanocortin 3 receptor (POMC)	5.54	5.61	1.18
Mc5r	melanocortin 5 receptor (POMC)	5.53	6	1.05
Agrp	MSH antagonist (POMC)	7.25	7.4	1.38
Prlh	prolactin releasing hormone (Prl)	6.61	6.67	1.11

## Sheet: Table S5
Table S5: Rapamycin and 2-DG-induced expression of genes related to HPA axis, synaptic proteins and synaptogenesis regulators, neuroreceptors, immunity, metabolism, and transporters/voltage-gated channels in the Fus1 KO mouse cochlea
Functional analysis of the top 100 upregulated and downregulated genes in the rapamycin and 2-DG-treated cochlea revealed strong enrichment of genes related to:
HPA axis, synaptic and synaptogenic proteins, neuroreceptors, immunity, metabolism, and transporters/voltage-gated channels.
Gene expression is expressed as a fold change relative to WT levels.
		HPA axis
	Gene Symbol	Gene name	Untreated	RAPA	2-DG
			KO/WT	KO treat/WT	KO treat/WT
	Pomc	pro-opiomelanocortin-alpha	-1.85	-4.16	-1.8
	Tac2	tachykinin 2	-1.99	-1.32	-1.23
	Calca	calcitonin/calcitonin-related polypeptide, alpha	-1.8	-1.36	-1.77
	Spx	spexin hormone	-1.57	-1.34	-1.21
	Gh	growth hormone	2.89	-2.75	-2.15
	Cga	glycoprotein hormones, alpha subunit	2.87	-1.59	-1.28
	Prl	prolactin	2.56	-2.59	-2.2
		Synaptic proteins and regulators of synaptogenesis
	Gene Symbol	Gene name	Untreated	RAPA	2-DG
			KO/WT	KO treat/WT	KO treat/WT
	Bdnf	brain derived neurotrophic factor	-1.96	-1.44	-1.27
	Bsn	bassoon	-1.59	1.1	-1.14
	Pcdhb21; Pcdhb22	protocadherin beta 21; protocadherin beta 22	-1.88	-1.83	-1.05
	Sirpb1a	signal-regulatory protein beta 1A	-1.86	-1.1	1.01
	Camk2a	calcium/calmodulin-dependent protein kinase II alpha	-1.57	1.47	-1.26
	Zdhhc23	zinc finger, DHHC domain containing 23	1.63	1.22	1.15
	Dbh	dopamine beta hydroxylase	1.62	1.27	1.2
	Lrrtm4	leucine rich repeat transmembrane neuronal 4	1.58	1.16	1.65
		Neuroreceptors
	Gene Symbol	Gene name	Untreated	RAPA	2-DG
			KO/WT	KO treat/WT	KO treat/WT
	Oprm1	opioid receptor, mu 1	-1.81	-1.89	1.89
	Chrnb1	cholinergic receptor, nicotinic, beta polypeptide 1 (muscle)	1.92	1.5	1.59
	Gabrp	gamma-aminobutyric acid (GABA) A receptor, pi	1.92	1.99	1.92
	Grin3a	glutamate receptor ionotropic, NMDA3A	1.77	1.22	-1.1
	Gpr83	G protein-coupled receptor 83	1.76	1.45	1.5
	Uts2r	urotensin 2 receptor	1.65	1.41	1.21
	Htr3a	5-hydroxytryptamine (serotonin) receptor 3A	1.61	1.75	1.28
	Vipr1	vasoactive intestinal peptide receptor 1	1.61	1.6	1.02
	Gabra2	gamma-aminobutyric acid (GABA) A receptor, subunit alpha 2	1.6	1.53	1.09
		Immune-related genes
	Gene Symbol	Gene name	Untreated	RAPA	2-DG
			KO/WT	KO treat/WT	KO treat/WT
1	Epx	eosinophil peroxidase	-2.24	-1.29	-2.56
2	Ear7; Ear6	eosinophil-associated, ribonuclease A family, member 7; eosinophil-associated, ribonuclease A family, member 6	-2.08	-1.2	-2.29
3	Ear10	eosinophil-associated, ribonuclease A family, member 10	-2.08	-1.68	-2
4	Ear1	eosinophil-associated, ribonuclease A family, member 1	-2.02	-1.18	-2.16
5	Ccr3	chemokine (C-C motif) receptor 3	-1.98	-1.19	-1.03
6	Ear12; Ear2; Ear3	eosinophil-associated, ribonuclease A family, member 12; eosinophil-associated, ribonuclease A family, member 2; eosinophil-associated, ribonuclease A family, member 3	-1.95	-1.14	-1.83
7	Cd163	CD163 antigen	-1.91	-1.56	-1.48
8	Bank1	B cell scaffold protein with ankyrin repeats 1	-1.89	-1.39	-1.49
9	Il5ra	interleukin 5 receptor, alpha	-1.89	-1.19	-1.72
10	Ccr9	chemokine (C-C motif) receptor 9	-1.87	-1.26	-1.47
11	Card11	caspase recruitment domain family, member 11	-1.85	-1.51	-1.76
12	Trim5	tripartite motif-containing 5	-1.84	-1.47	-1.41
13	Ikzf3	IKAROS family zinc finger 3	-1.84	-1.21	-1.8
14	Tnfsf4	tumor necrosis factor (ligand) superfamily, member 4	-1.78	-1.59	-1.49
15	Il1rn	interleukin 1 receptor antagonist	-1.78	1.01	-1.26
16	Irf4	interferon regulatory factor 4	-1.74	1.05	-1.07
17	Adgre4	adhesion G protein-coupled receptor E4	-1.73	1.04	-1.24
18	Serpina1c	serine (or cysteine) peptidase inhibitor, clade A, member 1C	-1.72	-1.54	-1.22
19	Fbxw14	F-box and WD-40 domain protein 14	-1.66	-1.15	-1.06
20	Egr1	early growth response 1	-1.65	-1.64	-2.05
21	Ptpn22	protein tyrosine phosphatase, non-receptor type 22 (lymphoid)	-1.64	-1.11	-1.03
22	Cd3e	CD3 antigen, epsilon polypeptide	-1.63	-1.72	-1.27
23	Mbl1	mannose-binding lectin (protein A) 1	-1.63	-1.49	-1.57
24	Ifi202b; Ifi205	interferon activated gene 202B; interferon activated gene 205	-1.61	-1.36	-1.39
25	Ifna14	interferon alpha 14	-1.61	1	-1.05
26	Ret	ret proto-oncogene	-1.61	-1.38	-1.62
27	Ccr1l1	chemokine (C-C motif) receptor 1-like 1	-1.61	-1.4	-1.57
28	Prg2	proteoglycan 2, bone marrow	-1.59	-1.11	-1.78
29	Kpna4	karyopherin (importin) alpha 4	-1.58	-1.29	-1.18
30	Tnfrsf9	tumor necrosis factor receptor superfamily, member 9	-1.58	-1.04	-1.41
31	Slfn5	schlafen 5	-1.58	1.02	1.07
32	Ccr6	chemokine (C-C motif) receptor 6	-1.58	-1.23	-1.88
33	Tlr11	toll-like receptor 11	-1.57	-1.22	-1.16
34	Fgr	Gardner-Rasheed feline sarcoma viral (Fgr) oncogene homolog	-1.56	-1.04	-1.21
35	Cd79a	CD79A antigen (immunoglobulin-associated alpha)	-1.56	-1.16	-1.49
36	Pou2af1	POU domain, class 2, associating factor 1	-1.56	-1.07	-1.59
37	Blnk	B cell linker	-1.56	-1.13	-1.38
38	Bpifb1	BPI fold containing family B, member 1	3.13	8.65	4.04
39	Retnla	resistin like alpha	2.71	1.01	2.28
40	Cfd	complement factor D (adipsin)	2.34	2.32	1.4
41	Ccl21b	chemokine (C-C motif) ligand 21B (leucine)	2.16	3.7	3.02
42	Bpifa1	BPI fold containing family A, member 1	1.97	2.27	1.36
43	Muc1	mucin 1, transmembrane	1.87	2.37	2.63
44	Ube2cbp	ubiquitin-conjugating enzyme E2C binding protein	1.79	1.32	1.77
45	Ccl21a; Gm1987	predicted gene 1987; chemokine (C-C motif) ligand 21A (serine)	1.79	2.39	2.37
46	Sarm1	sterile alpha and HEAT/Armadillo motif containing 1	1.77	1.06	1.17
47	Aif1	allograft inflammatory factor 1	1.74	1.61	1.96
48	Ccl21c; Gm21541	chemokine (C-C motif) ligand 21C (leucine); predicted gene, 21541	1.69	2.67	2.38
49	Gm13276	predicted gene 13276	1.66	1.05	1.06
50	Ifi27l2a	interferon, alpha-inducible protein 27 like 2A	1.64	1.03	1.21
51	Ly6g	lymphocyte antigen 6 complex, locus G	1.62	1.15	1.17
52	Hcst	hematopoietic cell signal transducer	1.62	1.17	-1.24
53	Ccl21a; Gm1987	chemokine (C-C motif) ligand 21A (serine); predicted gene 1987	1.61	2.39	1.95
54	Il25	interleukin 25	1.58	1.66	1.56
		Metabolic genes
	Gene Symbol	Gene name	Untreated	RAPA	2-DG
			KO/WT	KO treat/WT	KO treat/WT
1	Dgkh	diacylglycerol kinase, eta	-1.91	-1.45	-1.28
2	Akr1c14	aldo-keto reductase family 1, member C14	-1.75	-1.5	-1.58
3	Cel	carboxyl ester lipase	-1.74	-1.22	1.01
4	Sult1e1	sulfotransferase family 1E, member 1	-1.7	-1.18	1.12
5	Ucp3	uncoupling protein 3 (mitochondrial, proton carrier)	-1.66	1.86	1.16
6	Cth	cystathionase (cystathionine gamma-lyase)	-1.63	-1.63	-1.35
7	Alox15	arachidonate 15-lipoxygenase	-1.63	1.07	-1.64
8	Sdr9c7	short chain dehydrogenase/reductase family 9C, member 7	-1.61	-1.19	-1.38
9	Aspdh	aspartate dehydrogenase domain containing	-1.6	-1.75	-1.72
10	Ucp1	uncoupling protein 1 (mitochondrial, proton carrier)	5.01	1.78	3
11	Lect1	leukocyte cell derived chemotaxin 1	3.14	2.41	3.19
12	Lipf	lipase, gastric	2.59	7.34	2.98
13	Pck1	phosphoenolpyruvate carboxykinase 1, cytosolic	2.12	2.22	1.66
14	Gal3st2	galactose-3-O-sulfotransferase 2	1.96	1.22	1.54
15	Cidec	cell death-inducing DFFA-like effector c	1.88	1.37	1.35
16	Hrasls	HRAS-like suppressor	1.87	1.38	-1.01
17	Cidea	cell death-inducing DNA fragmentation factor, alpha subunit-like effector A	1.86	1.03	1.59
18	Cbr2	carbonyl reductase 2	1.8	1.63	1.39
19	Psca	prostate stem cell antigen	1.74	1.06	1.37
20	Fabp4	fatty acid binding protein 4, adipocyte	1.74	1.38	1.23
21	Cbr1	carbonyl reductase 1	1.71	1.42	1.42
22	Aldh3b3	aldehyde dehydrogenase 3 family, member B3	1.7	1.8	1.46
23	Spata18	spermatogenesis associated 18	1.7	1.72	1.32
24	Nox3	NADPH oxidase 3	1.67	1.43	2.06
25	Paox	polyamine oxidase (exo-N4-amino)	1.66	1.07	-1.07
26	Muc16	mucin 16	1.65	1.42	-1.04
27	Nme6	NME/NM23 nucleoside diphosphate kinase 6	1.64	1.55	1.09
28	Hmgcll1	3-hydroxymethyl-3-methylglutaryl-Coenzyme A lyase-like 1	1.64	1.84	1.71
29	Thrsp	thyroid hormone responsive	1.64	1.27	1.21
30	Pnliprp1	pancreatic lipase related protein 1	1.63	1.55	1.42
31	Ephx2	epoxide hydrolase 2, cytoplasmic	1.62	1.17	1.48
32	Dgkk	diacylglycerol kinase kappa	1.62	1.25	1.09
33	Klk1b21	kallikrein 1-related peptidase b21	1.62	1.16	1.04
35	Abcg5	ATP-binding cassette, sub-family G (WHITE), member 5	1.6	1.2	1.39
36	Dgat2	diacylglycerol O-acyltransferase 2	1.59	1.08	1.11
37	Ins1	insulin I	1.58	1.14	1.14
38	Fabp7	fatty acid binding protein 7, brain	1.58	1.77	1.32
39	Glyctk	glycerate kinase	1.58	1.29	1.42
40	D2hgdh	D-2-hydroxyglutarate dehydrogenase	1.58	1.05	1.37
		Transporters and voltage-gated channels (VGC)
	Gene Symbol	Gene name	Untreated	RAPA	2-DG
			KO/WT	KO treat/WT	KO treat/WT
1	Abcg3	ATP-binding cassette, sub-family G (WHITE), member 3	-1.82	-1.48	-1.46
2	Scn10a	sodium channel, voltage-gated, type X, alpha	-1.77	-1.6	-1.99
3	Rhbg; Tsacc	Rhesus blood group-associated B glycoprotein; TSSK6 activating co-chaperone	-1.68	-1.6	-1.9
4	Trdn	triadin	-1.68	4.79	3.12
5	Atp6v0a4	ATPase, H+ transporting, lysosomal V0 subunit A4	-1.63	-1.25	-1.51
6	Slc25a48	solute carrier family 25, member 48	-1.6	-1.16	-1.08
7	Scn11a	sodium channel, voltage-gated, type XI, alpha	-1.56	-1.92	-1.57
8	Aqp7	aquaporin 7	2.09	2.13	2.04
9	Slc25a31	solute carrier family 25 (mitochondrial carrier; adenine nucleotide translocator), member 31	2.07	1.32	1.11
10	Slc5a8	solute carrier family 5 (iodide transporter), member 8	1.74	1.41	1.03
11	Slc16a11	solute carrier family 16 (monocarboxylic acid transporters), member 11	1.73	1.45	1.13
12	Svopl	SV2 related protein homolog (rat)-like	1.7	1.36	1.58
13	Scn3a	sodium channel, voltage-gated, type III, alpha	1.67	1.12	1.31
14	Kcnrg	potassium channel regulator	1.64	1.53	1.08
15	Slc6a16; RP23-289F7.2	solute carrier family 6, member 16 [Source:MGI Symbol;Acc:MGI:2685930]; novel transcript; solute carrier family 6, member 16	1.64	1.19	1.17
16	Slc4a3	solute carrier family 4 (anion exchanger), member 3	1.62	1.09	1.05
17	Crisp2	cysteine-rich secretory protein 2	1.6	1.59	1.31
18	Svop	SV2 related protein	1.59	1.57	1.18

## Sheet: Table S6
Table S6: Rapamycin and 2-DG-induced expression of genes related to calcium-linked transporters/channels, cytoskeletal and motor proteins, and glycolysis and energy metabolism in the Fus1 KO cochlea
Functional analysis of the top 100 upregulated genes in the rapamycin and 2-DG-treated cochlea revealed strong enrichment of genes related to:
1) calcium-linked transporters and voltage-gated channels, 2) cytoskeletal and motor proteins, and 3) glycolysis and energy metabolism.
Gene expression is expressed as a fold change relative to WT levels.
		Ca2+-linked transporters and voltage-gated channels
	Gene Symbol	Gene name	Untreated	RAPA	2-DG
			KO/WT	KO treat/WT	KO treat/WT
	Cacna1s	calcium channel, voltage-dependent, L type, alpha 1S subunit	1.03	1.42	2.33
	Ryr1	ryanodine receptor 1, skeletal muscle	1.14	2.25	1.57
	Clcn1	chloride channel, voltage-sensitive 1	1.36	2.14	1.78
	Srl	sarcalumenin	1.13	2.04	1.33
	Kcne4	potassium voltage-gated channel, Isk-related subfamily, gene 4	1.37	1.96	1.51
	Cacng1	calcium channel, voltage-dependent, gamma subunit 1	1.14	1.91	1.22
	Trdn	triadin	-1.68	4.79	3.12
		Cytoskeleton and motor proteins
	Gene Symbol	Gene name	Untreated	RAPA	2-DG
			KO/WT	KO treat/WT	KO treat/WT
1	Myh2	myosin, heavy polypeptide 2, skeletal muscle, adult	-1.45	7.85	3.55
2	Myh4	myosin, heavy polypeptide 4, skeletal muscle	-1.15	15.01	8.23
3	Myh8	myosin, heavy polypeptide 8, skeletal muscle, perinatal	-1	16.83	7.61
4	Mylpf	myosin light chain, phosphorylatable, fast skeletal muscle	1.38	13.73	5.63
5	Myh1	myosin, heavy polypeptide 1, skeletal muscle, adult	1.07	11.92	5.08
6	Ankrd1	ankyrin repeat domain 1 (cardiac muscle)	-1.03	4.45	3.73
7	Myl1	myosin, light polypeptide 1	-1.08	6.4	3.72
8	Mmp12	matrix metallopeptidase 12	-1.18	-2.78	3.53
9	Tnnt3	troponin T3, skeletal, fast	-1.23	8.23	3.46
10	Myot	myotilin	-1.07	6.85	3.26
11	Myoz2	myozenin 2	1.2	3.71	3.24
12	Trdn	triadin	-1.68	4.79	3.12
13	Acta1	actin, alpha 1, skeletal muscle	-1.69	6.95	2.15
14	Tnni2	troponin I, skeletal, fast 2	1.29	8.47	3.16
15	Neb	nebulin	1.11	4.96	2.97
16	Casq1	calsequestrin 1	1.22	8.27	2.91
17	Des	desmin	1.49	4.38	2.74
18	Myoz1	myozenin 1	1.29	2.63	2.3
19	Hspb6	heat shock protein, alpha-crystallin-related, B6	1.48	3.08	2.2
20	Tpm2	tropomyosin 2, beta	1.02	4.41	2.14
21	Nrap	nebulin-related anchoring protein	1.06	3.32	2.03
22	Mylk4	myosin light chain kinase family, member 4	1.12	3.31	1.95
23	Ifltd1	intermediate filament tail domain containing 1	1.12	1.25	1.89
24	Mstn	myostatin	-1.22	2.56	1.87
25	Panx3	pannexin 3	1.53	1.49	1.83
26	Tnnc2	troponin C2, fast	1.09	4.21	1.81
27	Hrc	histidine rich calcium binding protein	1.5	2.59	1.73
28	Ldb3	LIM domain binding 3	1.24	3.28	1.96
29	Pdlim3	PDZ and LIM domain 3	-1.05	2.64	1.33
30	Col3a1	collagen, type III, alpha 1	1.68	2.45	1.51
31	Mybpc2	myosin binding protein C, fast-type	-1.19	2.41	1.28
32	Tmod4	tropomodulin 4	-1.26	2.37	-1.05
33	Lmod2	leiomodin 2 (cardiac)	-1.14	2.31	1.16
34	Nexn	nexilin	1.42	2.31	1.16
35	Txlnb	taxilin beta	-1.08	2.23	1.57
36	Actn2	actinin alpha 2	-1.43	2.18	1.39
37	Filip1l	filamin A interacting protein 1-like	-1.02	2.15	1.56
38	Cfap57	cilia and flagella associated protein 57	1.48	2.15	1.42
39	Actc1	actin, alpha, cardiac muscle 1	-1.34	2.12	1.58
40	Mypn	myopalladin	1.2	2.03	1.49
41	Dpt	dermatopontin	1.94	2	1.07
42	Krt14	keratin 14	1.42	1.98	1.31
43	Fsd2	fibronectin type III and SPRY domain containing 2	-1.01	1.96	1.28
44	Myom1	myomesin 1	1.06	1.94	1.36
45	Itgb1bp2	integrin beta 1 binding protein 2	1.12	1.94	1.62
		Glycolysis and energy metabolism proteins
	Gene Symbol	Gene name	Untreated	RAPA	2-DG
			KO/WT	KO treat/WT	KO treat/WT
	Atp2a1	ATPase, Ca++ transporting, cardiac muscle, fast twitch 1	1.16	10.76	6.11
	Eno3	enolase 3, beta muscle	1.27	5.48	3.16
	Cox6a2	cytochrome c oxidase subunit VIa polypeptide 2	-1.16	4.34	2.68
	Pgam2	phosphoglycerate mutase 2	-1.18	3.01	1.37
	Ckmt2	creatine kinase, mitochondrial 2	-1.03	3.05	2.52
	Pygm	muscle glycogen phosphorylase	-1.26	2.35	1.39
	Pck1	phosphoenolpyruvate carboxykinase 1, cytosolic	2.12	2.22	1.66
	Ucp3	uncoupling protein 3 (mitochondrial, proton carrier)	-1.66	1.86	1.16
	Hmgcll1	3-hydroxymethyl-3-methylglutaryl-Coenzyme A lyase-like 1	1.64	1.84	1.71
