# Supplementary material for: Pharmacological Modulation of Energy and Metabolic Pathways Protects Hearing in the Fus1 KO Model of Mitochondrial Dysfunction and Oxidative Stress
Source: Preprints.org preprint supplement (doi:10.20944/preprints202305.1260.v1), 2023-05-18
Supplement: Supplementary file 1 [file supplementary]

# Figure S1

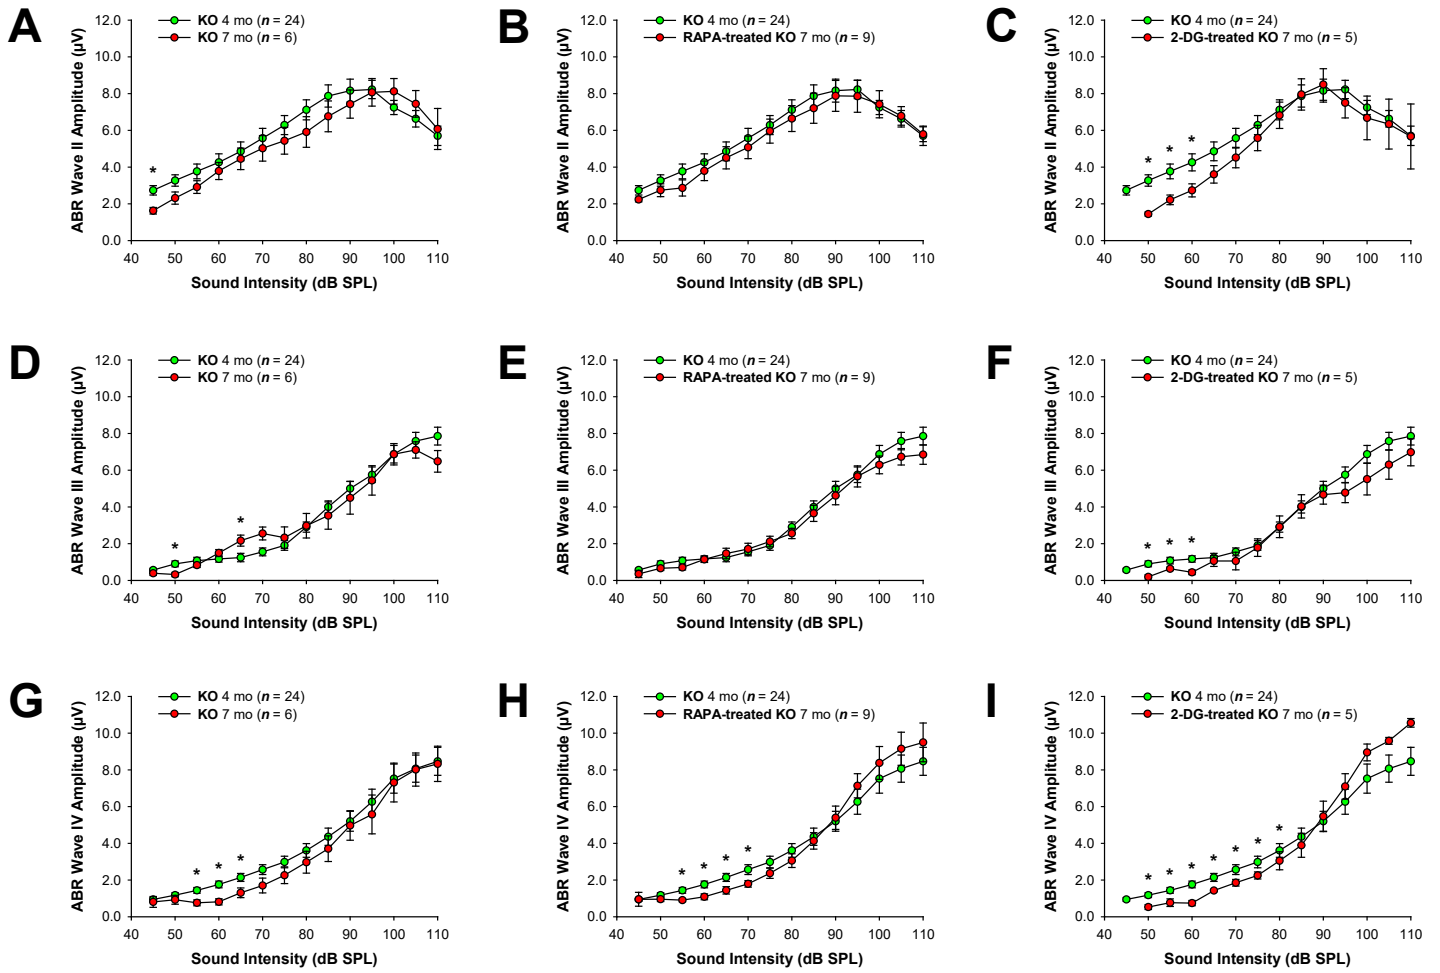

**Figure S1: ABR wave II-IV amplitudes in rapamycin and 2-DG-treated *Fus1* KO mice.** (A-C) Shown are I/O function graphs of the average amplitude of ABR wave II as a function of sound intensity at 16 kHz in A) KO mice at 4 and 7 months of age; B) untreated and rapamycin-treated KO mice; C) untreated and 2-DG-treated KO mice. (D-F) Shown are I/O function graphs of the average amplitude of ABR wave III as a function of sound intensity at 16 kHz in D) KO mice at 4 and 7 months of age; E) untreated and rapamycin-treated KO mice; F) untreated and 2-DG-treated KO mice. (G-I) Shown are I/O function graphs of the average amplitude of ABR wave IV as a function of sound intensity at 16 kHz in G) KO mice at 4 and 7 months of age; H) untreated and rapamycin-treated KO mice; I) untreated and 2-DG-treated KO mice. Data are presented as mean  $\pm$  SEM. \* =  $p < 0.05$ , \*\* =  $p < 0.01$  (Student's t-test).

## Figure S2

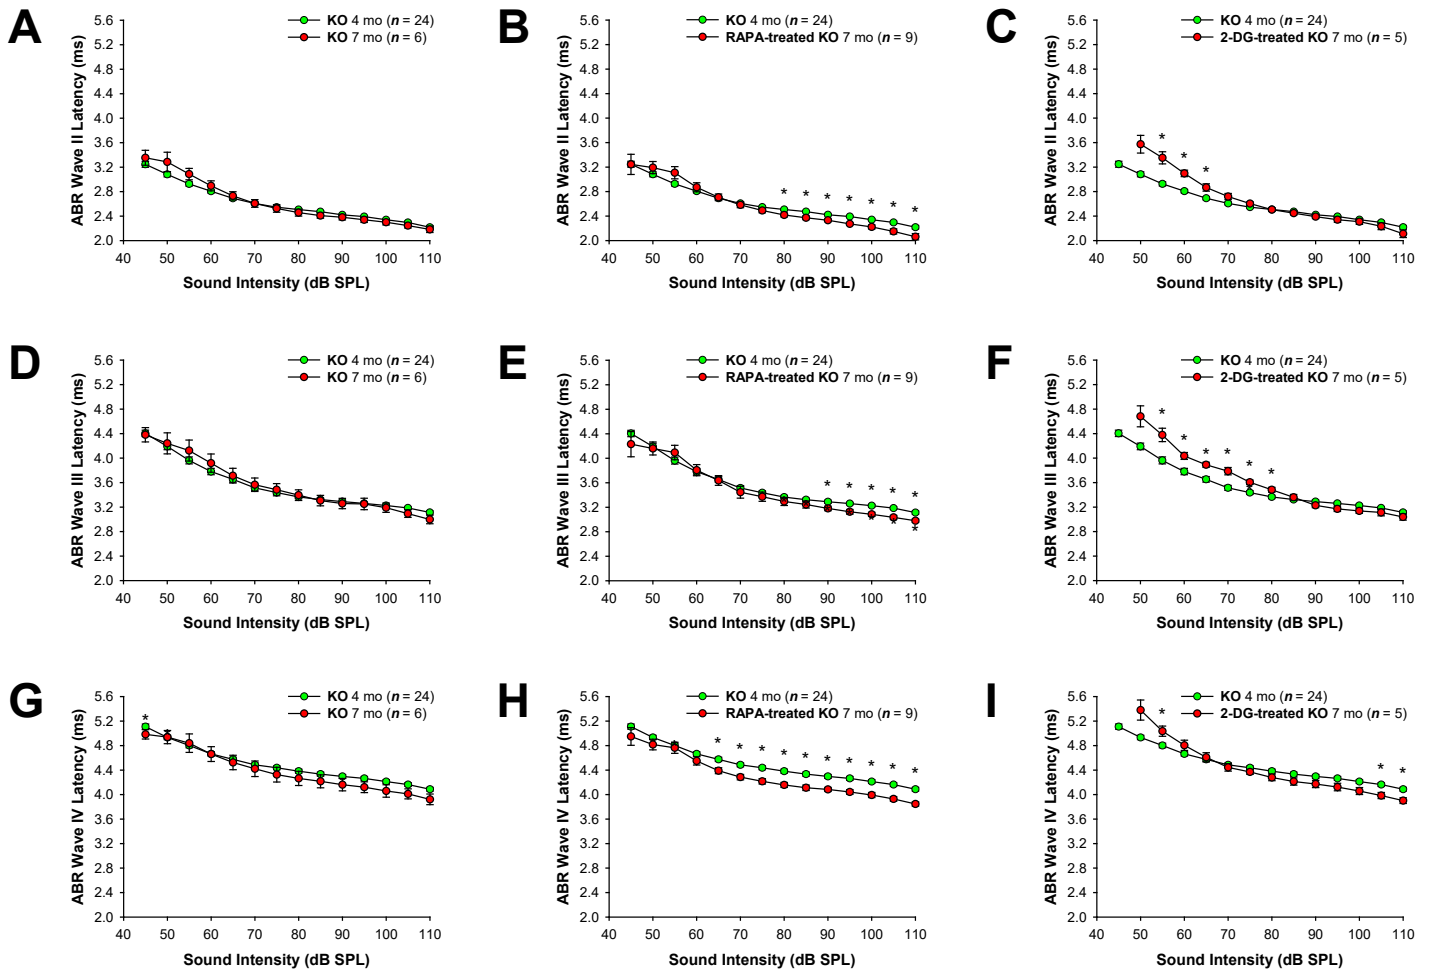

**Figure S2: ABR wave II-IV latencies in rapamycin and 2-DG-treated *Fus1* KO mice.** (A-C) Shown are I/O function graphs of the average latency of ABR wave II as a function of sound intensity at 16 kHz in A) KO mice at 4 and 7 months of age; B) untreated and rapamycin-treated KO mice; C) untreated and 2-DG-treated KO mice. (D-F) Shown are I/O function graphs of the average latency of ABR wave III as a function of sound intensity at 16 kHz in D) KO mice at 4 and 7 months of age; E) untreated and rapamycin-treated KO mice; F) untreated and 2-DG-treated KO mice. (G-I) Shown are I/O function graphs of the average latency of ABR wave IV as a function of sound intensity at 16 kHz in G) KO mice at 4 and 7 months of age; H) untreated and rapamycin-treated KO mice; I) untreated and 2-DG-treated KO mice. Data are presented as mean  $\pm$  SEM. \* =  $p < 0.05$ , \*\* =  $p < 0.01$  (Student's t-test).
